1 **A coordinated function of lncRNA HOTTIP and miRNA-196b underpinning**  
2 **leukemogenesis by targeting Fas signaling**

3

4 Ajeet P. Singh<sup>1, 2 # \*</sup>, Huacheng Luo<sup>1 \*</sup>, Meghana Matur<sup>1</sup>, Melanie Eshelman<sup>1</sup>, Arati  
5 Sharma<sup>3, 4, 5</sup>, Suming Huang<sup>1, 5 #</sup>

6

7 <sup>1</sup>Division of Pediatric Hematology/Oncology, Department of Pediatrics, Pennsylvania  
8 State University, College of Medicine, Hershey, PA 17033, USA

9 <sup>2</sup>Department of Biochemistry & Molecular Biology, Pennsylvania State University, College  
10 of Medicine, Hershey, PA 17033, USA

11 <sup>3</sup>Department of Medicine, Division of Hematology and Oncology, Pennsylvania State  
12 University, College of Medicine, Hershey, PA, USA

13 <sup>4</sup>Department of Pharmacology, Pennsylvania State University, College of Medicine,  
14 Hershey, PA, USA

15 <sup>5</sup>Penn State Cancer Institute, Pennsylvania State University, College of Medicine,  
16 Hershey, PA 17033, USA

17

18 Key words: Long non-coding RNA, micro-RNA, Epigenetics, Cancer, Leukemia

19

20 \*Equally contributed

21

22 #Correspondence: [asingh6@pennstatehealth.psu.edu](mailto:asingh6@pennstatehealth.psu.edu),

23 [shuang4@pennstatehealth.psu.edu](mailto:shuang4@pennstatehealth.psu.edu)

## 24 **Abstract**

25 MicroRNAs (miRNAs) may modulate more than 60% of human coding genes and act as  
26 negative regulators, while long non-coding RNAs (lncRNAs) regulate gene expression on  
27 multiple levels by interacting with chromatin, functional proteins, and RNAs such as  
28 mRNAs and microRNAs. However, the crosstalk between lncRNA *HOTTIP* and miRNAs  
29 in leukemogenesis remains elusive. Using combined integrated analyses of global miRNA  
30 expression profiling and state-of-the-art genomic analyses of chromatin such as ChIRP-  
31 seq., (genome wide *HOTTIP* binding analysis), ChIP-seq., and ATAC-seq., we found that  
32 miRNA genes are directly controlled by *HOTTIP*. Specifically, the HOX cluster miRNAs  
33 (miR-196a, miR-196b, miR-10a and miR-10b), located *cis* & *trans*, were most dramatically  
34 regulated and significantly decreased in *HOTTIP*<sup>-/-</sup> AML cells. *HOTTIP* bound to the miR-  
35 196b promoter, and *HOTTIP* deletion reduced chromatin accessibility and enrichment of  
36 active histone modifications at HOX cluster associated miRNAs in AML cells, while  
37 reactivation of *HOTTIP* restored miR gene expression and chromatin accessibility in the  
38 CTCF-boundary-attenuated AML cells. Inactivation of *HOTTIP* or miR-196b promotes  
39 apoptosis by altering the chromatin signature at the *FAS* promoter and increasing *FAS*  
40 expression. Transplantation of miR-196b knockdown MOLM13 cells in NSG mice  
41 increased overall survival compared to wild-type cells. Thus, *HOTTIP* remodels the  
42 chromatin architecture around miRNAs to promote their transcription, consequently  
43 repressing tumor suppressors and promoting leukemogenesis.

44

## 45 **Introduction**

46 Non-coding RNAs are emerging as important regulators of gene expression in multiple  
47 cellular processes, especially in cancer<sup>1</sup>. In particular, long non-coding RNAs (lncRNAs)  
48 are involved in regulating chromatin dynamics, gene expression, cell growth,  
49 differentiation, and development<sup>2</sup>. Overexpression of *HOXA9* is a dominant factor driving  
50 certain subtypes of human acute myeloid leukemia (AML)<sup>3</sup>. Moreover, the aberrant  
51 activation of posterior HOXA gene, *HOXA9*, and its cofactor, *MEIS1*, following a variety  
52 of genetic alterations, including MLL-translocations, NUP98-fusion, CDX dysregulation,  
53 and monocytic leukemia zinc-finger fusion, was associated with poor prognosis and  
54 treatment response<sup>4</sup>. lncRNAs regulate transcription through recruiting histone modifiers  
55 and chromatin remodeling factors that play active roles in various aspects of development  
56 and disease state<sup>5-10</sup>. The lncRNA *HOTTIP*, located at the posterior end of HOXA gene  
57 cluster, acts as a scaffold to recruit the WDR5-MLL-complex to the promoters of posterior  
58 HOXA genes and positively regulates their expression in normal hematopoiesis and AML  
59 leukemogenesis<sup>5,11</sup>. In contrast, loss of *HOTTIP* strongly inhibits posterior (*HOXA9*-  
60 *HOXA13*) compared to anterior HOXA gene expression (e.g., *HOXA1*-*HOXA7*)<sup>11</sup>.

61  
62 *HOTTIP* provides a basis for transcriptional activation and three-dimensional (3D)  
63 chromatin organization in the 5' HOXA gene loci by acting downstream of the CBS7/9  
64 boundary (CTCF binding site located between *HOXA7* and *HOXA9*)<sup>11</sup>. Our previous data  
65 indicated that depleting *HOTTIP* reduces active histone marks (H3K4me3 and  
66 H3K79me2) and enhances repressive histone marks (H3K27me3) resulting in a switch  
67 from an active to a repressive chromatin state in the promoter region of the 5' HOXA  
68 genes in MOLM13 cells. Genome-wide binding analysis of *HOTTIP* lncRNA using

69 chromatin isolation by RNA purification combining deep sequencing (ChIRP-seq)  
70 revealed that *HOTTIP* directly regulates its target genes through *cis* and *trans* binding at  
71 *HOXA9-13*, *RUNX1* and *MEIS1* genes. Consequently, *HOTTIP* also binds in *cis* and *trans*  
72 regulatory patterns to non-coding regions and certain annotated genes involved in  
73 chromatin organization, hematopoiesis, myeloid cell differentiation, cell-cycle  
74 progression, and JAK-STAT and WNT signaling pathways. These findings suggested that  
75 *HOTTIP* lncRNA might control gene expression by interacting with and regulating non-  
76 coding regulatory elements such as microRNAs (miRNAs) in *cis* and *trans*<sup>11</sup>.

77

78 Growing evidence indicates that non-coding RNAs, in particular lncRNAs and  
79 microRNAs, regulate one another and cooperate to influence the levels of target mRNAs  
80 in a cell-type specific manner<sup>12</sup>. lncRNAs process, interact with, and regulate miRNAs at  
81 both transcriptional and post-transcriptional levels<sup>13</sup>. lncRNAs can function as miRNA  
82 sponges, acting as decoys to impair the functional interaction of a miRNA and its target  
83 mRNA, thereby preventing suppression of gene expression<sup>14</sup>. Additionally, lncRNAs can  
84 be precursors of miRNAs and regulate miRNA biogenesis at different points. Primary  
85 miRNAs (pri-miRNAs) are transcribed in the genome (i) either within the body of another  
86 gene and often their expression is linked to the expression of the parent transcript, or (ii)  
87 from independent miRNA genes, similar to mRNA, where transcription is primarily  
88 controlled by RNA polymerase II-driven promoters<sup>15</sup>. However, the molecular  
89 mechanisms, particularly those mediated by lncRNAs, regulating miRNAs transcription  
90 remains elusive.

91

92        MicroRNAs (miRNAs) are 20-22 nucleotide non-coding RNAs that inhibit target gene  
93        expression post-transcriptionally either by translational repression or mRNA degradation  
94        via binding at complementary seed sequences mainly located at the 3' UTR. Widespread  
95        dysregulation of certain miRNAs associated with hematological malignancies, including  
96        acute myeloid leukemia<sup>16</sup>. Besides the role of lncRNA *HOTTIP* in regulating  
97        hematopoietic genes, miRNAs also control leukemic and tumor suppressor gene  
98        expression<sup>17</sup>. In particular, miR-196b, which is located adjacent to *HOXA9*, targets  
99        *HOXA9* and its cofactor *MEIS1*<sup>18</sup>. It also targets proapoptotic factor *FAS*<sup>19</sup>, suggesting a  
100        double-edged sword (miR-196b) that could simultaneously repress both the oncogenic  
101        and tumor suppressor target genes. Recent studies have shown the importance of miR-  
102        196b in AML; however, the mechanism of its transcriptional regulation remains unknown  
103        in AML. Thus, in this study we characterize the mechanisms by which *HOTTIP* controls  
104        the expression and function of *HOXA9* and *FAS* through miR-196b in human AML.

105

## 106        **Results**

107

### 108        ***HOTTIP* lncRNA differentially regulates microRNAs in AML**

109        To define the mechanism by which *HOTTIP* regulates gene expression in AML, we  
110        compared genome wide microRNA expression patterns between wild-type (WT) and  
111        *HOTTIP*<sup>-/-</sup> MOLM13 AML cells by performing small-RNA-sequencing (smRNA-seq)  
112        analysis (Figure 1A). Differential expression analysis shows that a total 569 miRNAs  
113        changed more than 2-fold in *HOTTIP*<sup>-/-</sup> cells compared to WT cells, including 333 down-  
114        regulated miRNAs and 236 upregulated miRNAs (Figure 1B, C). These altered miRNAs

115 in *HOTTIP*<sup>-/-</sup> cells play vital roles in molecular and cellular processes, including  
116 hematopoiesis and leukemogenesis, suggesting that *HOTTIP* controls AML pathogenesis  
117 by regulating miRNAs. Gene ontology (GO) analysis revealed that *HOTTIP*-regulated  
118 miRNAs were involved in many biological processes including the metabolic process,  
119 regulation of gene expression, transcription, and RNA processing (Figure 1D).

120 Next, we sought to determine whether *HOTTIP*-regulated miRNAs control the  
121 expression of *HOTTIP*-regulated mRNAs. *In silico* analysis revealed that *HOTTIP*-  
122 regulated miRNAs are predicted to directly target 4347 mRNAs. We compared these with  
123 863 mRNAs that we previously demonstrated are transcriptionally regulated by  
124 *HOTTIP*<sup>11</sup>. Strikingly, 357 genes are co-regulated by both *HOTTIP*-associated miRNAs  
125 and *HOTTIP* itself in AML, including hematopoietic and leukemic signature genes like  
126 HOXA factors (e.g., *HOXA9*, *HOXA13*), *MYC*, *ETS1*, *VEGFA*, *ZEB2*, *TEAD4*, *WNT5a*,  
127 *WNT2* and *FAS* (Figure 1E, F).

128

### 129 **Depletion of *HOTTIP* inhibits the HOX clusters' miRNAs in *cis* – *trans***

130 Within the HOX cluster several non-coding transcripts, including miRNAs, are transcribed.  
131 Six miRNAs are transcribed within the intergenic regions of the HOX clusters (Figure 2A).  
132 Loss of *HOTTIP* impaired posterior HOXA gene expression (e. g. *HOX13-HOXA9*) but did  
133 not affect anterior *HOXA1-7* genes, HOXB, HOXC, or HOXD genes<sup>11</sup>. We asked whether  
134 depletion of *HOTTIP* affects miRNAs that are transcribed in either *cis* or *trans* in the  
135 intergenic region of the HOX cluster genes. Disruption of *HOTTIP* inhibits several HOX  
136 cluster-related miRNAs, including miR-196b-5p, miR-196a-5p, miR-10b-5p, and miR-  
137 10a-5p/3p (Figure 2B), suggesting these miRNAs are positively regulated by *HOTTIP* in

138 AML. Interestingly, while HOX cluster-associated miRNAs were altered, several HOX  
139 genes targeted by these miRNAs remained unaltered in *HOTTIP*<sup>-/-</sup> cells (Figure 1E). We  
140 performed correlation analysis of *HOXA9*, its cofactor *MEIS1*, miR-196b and *HOTTIP*  
141 according to the RNA-seq dataset of acute myeloid leukemia samples<sup>18</sup>. Our data  
142 analysis indicated that miR-196b correlates with expression of *HOTTIP*, posterior *HOXA*  
143 genes, *MEIS1*, and *PBX3*, which are aberrantly overexpressed in MLL-associated AML  
144 (Figure 2C, D). In contrast, pro-apoptotic genes, including *FAS*, *CASP3*, and *CASP9*,  
145 were downregulated in MOLM13 cells relative to miR-196b (Figure 2D). Additionally, miR-  
146 196a/b was enriched in *MLL-AF9* MOLM13 cells compared to non-MLL-rearranged  
147 leukemia cells such as KASUMI-1/t (8;21) (Figure 2E). However, the question remains  
148 whether miR-196b targets pro leukemic gene *HOXA9* in non-MLL-rearranged leukemia  
149 cells. The co-expression of *HOTTIP* and miR-196b and their inverse co-relation with pro-  
150 apoptotic genes suggests that *HOTTIP* and miR-196b may co-target these genes in *MLL*-  
151 *AF9* rearranged MOLM13 AML cells. Likewise, perhaps *HOTTIP* counteracts miR196b  
152 mediated repression of *HOXA9* in AML.

153

#### 154 ***HOTTIP* established chromatin signature on HOX clusters related miRNAs loci**

155 To further define the mechanism by which *HOTTIP* regulates miRNA expression, we  
156 employed ChIRP-sequencing (chromatin isolation by RNA purification) to identify  
157 *HOTTIP* binding genome-wide<sup>11</sup>. Our previous *HOTTIP* CHIRP-seq data indicated that  
158 *HOTTIP* mainly binds to non-coding regions, including promoter and intergenic regions.  
159 The question then arises whether *HOTTIP* binds to regulatory loci of miRNA to induce the  
160 differential expression we observed in *HOTTIP*<sup>-/-</sup> compared to WT MOLM13 cells. Our

161 data suggests that loss of *HOTTIP* greatly reduces its binding at the upstream promoter  
162 region of miR-196b compared to WT MOLM13 cells (Figure 3A), which is correlated with  
163 attenuated expression of miR-196b upon *HOTTIP*-depletion (Figure 2C). Furthermore, *de*  
164 *novo* binding motif analysis revealed that the *HOTTIP* bound genomic locus at miR-196b  
165 is occupied by transcription factors, CTCF, GATA-2, *MYC* and *CEBPB*, as well as many  
166 other chromatin remodeling factors (Supplementary Figure 1).

167         Next, we asked whether *HOTTIP* controls the chromatin signature on its targeted  
168 miRNA loci, using ChIP-seq (chromatin immunoprecipitation sequencing) for histone  
169 modifications (H3K4me3, H3K79me2; active; and H3K27me3; repressive) and ATAC-seq  
170 (assay for transposase-accessible chromatin using sequencing) to compare chromatin  
171 signatures between WT and *HOTTIP*<sup>-/-</sup> MOLM13 cells<sup>11</sup>. Depletion of *HOTTIP* resulted  
172 in marked decreases in H3K4me3 and H3K79me2 enrichment, while H3K27me3 levels  
173 were elevated on the genomic loci of all four HOX cluster miRNAs (Figure 3B-E). The  
174 changes in histone marks coincide with transcriptional changes (Figure 3B-E) and  
175 *HOTTIP* binding pattern alteration. Concomitantly with decreased *HOTTIP* binding and  
176 active histone marks in *HOTTIP*<sup>-/-</sup> cells, chromatin accessibility at regulatory loci of all  
177 four HOX cluster miRNAs was also reduced (Figure 3G-K). Therefore, *HOTTIP* governs  
178 its target genes by regulating the chromatin signature of specific miRNAs in the *MLLr*<sup>+</sup>  
179 AML.

180

181 ***HOTTIP* reactivation in *CBS7/9*<sup>+/-</sup> AML cells rescued the miRNA expression coupled**  
182 **with restored chromatin signature**



183 We previously demonstrated that *HOTTIP* coordinates with its upstream regulatory  
184 element the CTCF binding site located between *HOXA7* and *HOXA9* (*CBS7/9*) to activate  
185 posterior HOXA genes and other hematopoietic oncogenes<sup>11,20</sup>. Reactivation of  
186 endogenous *HOTTIP* expression using sgRNA targeted dCAS9-VP160 mediated  
187 promoter activation in the *CBS7/9*<sup>+/-</sup> MOLM13 cells efficiently restored posterior HOX  
188 gene (*HOXA9-HOXA13*) expression. These findings led us to test whether *HOTTIP*  
189 reactivation in *CBS7/9*<sup>+/-</sup> also affects miRNA expression and alters chromatin dynamics  
190 at the miRNA loci. Indeed, levels of all HOX cluster miRNAs were significantly repressed  
191 in *CBS7/9*<sup>+/-</sup> MOLM13 cells and completely restored in *CBS7/9*<sup>+/-</sup>-*HT-VP160* cells with  
192 reactivated *HOTTIP* (Figure 4A).

193 Next, we carried out ATAC-seq data analysis using WT, *CBS7/9*<sup>+/-</sup>, and *HOTTIP*-  
194 reactivated *CBS7/9*<sup>+/-</sup> MOLM13 cells. Repression of *HOTTIP* in *CBS7/9*<sup>+/-</sup> cell reduced  
195 chromatin accessibility at the HOX cluster-associate miRNA loci, while accessibility was  
196 largely restored in *HOTTIP*-activated *CBS*<sup>+/-</sup>-*HT-VP160* MOLM13 (Figure 5B). Hence,  
197 *HOTTIP* function is critical for regulating the chromatin accessibility and expression levels  
198 of HOX locus miRNAs.

199

## 200 **miR-196b simultaneously targets oncogenes and tumor suppressors to maintain** 201 **MLL-AF9 AML**

202 miR-196b represses a subset of targets with tumor suppressor activity *in vivo* and is  
203 selectively enriched by cooperation with MLL-AF9 to promote leukemogenesis<sup>18</sup>.  
204 Surprisingly, miR-196b also targets *HOXA9* and *MEIS1* that play essential oncogenic  
205 roles<sup>18</sup>. Because *HOTTIP* positively regulates both miR-196b and its target *HOXA9* and

206 *MEIS1*<sup>11</sup>, we investigated the miR-196b function in leukemogenesis. Expression of miR-  
207 196b was strongly suppressed in MOLM13 cells treated with LNA196b compare to NTC  
208 (non-targeting control). Although, MOLM13 cells have high levels of *HOXA9* expression,  
209 we assessed the regulatory effects of miR-196b on *HOXA9* and *MEIS1* in MOLM13 cells.  
210 Both *HOXA9* and *MEIS1* were significantly elevated upon miR-196b inhibition (Figure 5a).  
211 Reduction of miR-196b also resulted in increased expression of *HOXA13* in MOLM13  
212 cells (Figure 5A). This suggests that repressive function of miR-196b might fine tune  
213 expression of *HOTTIP* activated HOX genes in acute myeloid leukemia.

214 To further understand the pro-oncogenic role of miR-196b, we investigated the  
215 expression of tumor suppressor *FAS*, which is a verified target of miR-196b in AML  
216 subtypes and colon cancer cells<sup>18,19</sup>. Expression of *FAS* and its downstream genes  
217 *Caspase3* (*CASP3*) and *Caspase9* (*CASP9*) was significantly elevated in cells treated  
218 with LNA196b compare to NTC (Figure 5A). However, growth competition shows no  
219 difference in the proliferation rate of cells treated with LNA196b compared to NTC.

220 Next, we assessed whether overexpression of miR-196b simultaneously  
221 represses the expression of both oncogenes and tumor suppressors. Forced expression  
222 of miR-196b significantly represses *HOXA9*, *MEIS1*, *FAS*, *CASP3* and *CASP9* in  
223 MOLM13 cells (Figure 5B). To reveal the mechanism underlying the oncogenic role of  
224 miR-196b, we analyzed the apoptosis rate in MOLM13 cells treated with either LNA196b  
225 or NTC. Repression of miR-196b manifested a higher rate of apoptosis compared to NTC-  
226 treated MOLM13 cells (Figure 5C). These results indicate that miR-196b promotes  
227 leukemogenesis by down-regulating *FAS*, and its downstream genes, thus suppressing  
228 apoptosis in AML.

229

## 230 ***HOTTIP* inhibits *FAS* expression to maintain MLL-AF9 leukemia**

231 We previously reported that enforced expression of *HOTTIP* aberrantly elevated *HOXA9*-  
232 *HOXA13* genes, resulting in impaired hematopoietic stem cell (HSC) function and an  
233 increased leukemia stem cell (LSC) population *in vivo*<sup>11</sup>. Thus, we intend to define the  
234 mechanisms by which *HOTTIP* might control the LSC pool. Since *HOTTIP* regulates the  
235 chromatin signature and expression of miR-196b, which targets both oncogenes and pro-  
236 apoptotic genes (e.g., *FAS*) simultaneously, we investigated whether *HOTTIP* also  
237 targets *FAS* in AML. The mRNA level of *FAS* and its downstream pathway genes (e.g.,  
238 *CASP3*, *CASP8*, and *CASP9*) significantly increased in *HOTTIP*<sup>-/-</sup> relative to WT  
239 MOLM13 cells (Figure 6A). Further, we found that expression of the pro-apoptotic was  
240 enhanced in *CBS7/9*<sup>+/-</sup> cells in which *HOTTIP* expression is significantly repressed  
241 (Figure 6B). Intriguingly, when comparing *CBS7/9*<sup>+/-</sup> cells to WT cells (Figure 6B), mRNA  
242 levels of *CASP3* and *CASP9* were significantly elevated in while *CASP8* was unaffected.  
243 We next tested whether CRISPR-mediated endogenous gene activation of *HOTTIP* in  
244 these cells represses the pro-apoptotic genes. Reactivation of *HOTTIP* in the *CBS7/9*<sup>+/-</sup>  
245 cells strongly repressed *CASP3* and *CASP9* while the *CASP8* level remained unchanged  
246 (Figure 6B). Next, we carried out western blot analysis using WT, *HOTTIP*<sup>-/-</sup>, *CBS*<sup>+/-</sup>, and  
247 the *HOTTIP*-activated *CBS7/9*<sup>+/-</sup> MOLM13 cells. Cleaved *CASP3* protein level was  
248 markedly increased in *HOTTIP*<sup>-/-</sup> and *CBS7/9*<sup>+/-</sup> compare to WT cells, whereas the  
249 Cleaved *CASP3* protein level was undetectable upon *HOTTIP* reactivation, which closely  
250 resembles WT MOLM13 cells (Figure 6C). Then we examined the elevated level of  
251 cleaved *CASP3* upon *HOTTIP*<sup>-/-</sup> induced apoptotic cell death in MOLM13 cells. FACS

252 analysis clearly showed an increase in apoptotic cell death in *HOTTIP*<sup>-/-</sup> cells compared  
253 to WT cells (Figure 6D). Thus, HOTTIP directly controls AML cell survival and apoptosis  
254 by regulating the FAS-Caspase axis.

255 To evaluate how *HOTTIP* directly regulates *FAS* expression, we investigated the  
256 *HOTTIP* binding and chromatin signature at the promoter of *FAS* in WT, *HOTTIP*<sup>-/-</sup>,  
257 *CBS7/9*<sup>+/-</sup>, and *CBS7/9*<sup>+/-</sup>-HT-VP160 MOLM13 cell lines. Although, enrichment of the  
258 *HOTTIP* binding on the *FAS* promoter occurs at relatively low level, *HOTTIP* depletion  
259 affects histone modifications associated with active and repressive chromatin.  
260 Consistently, relative enrichment of active histone modifications (H3K4me3 and  
261 H3K79me2) was increased, whereas repressive histone modification (H3K27me3) was  
262 decreased in *HOTTIP*<sup>-/-</sup> compare to WT cells. Additionally, chromatin accessibility, as  
263 determined by ATAC-seq, was increased at the *HOTTIP* binding site on *FAS* in *CBS7/9*<sup>+/-</sup>  
264 , whereas reactivation of *HOTTIP* reduced accessibility, resembling WT MOLM13 cells.  
265 This suggests that *HOTTIP* maintains a repressive chromatin signature at the promoters  
266 of tumor suppressor genes to promote leukemogenesis.

267

### 268 **MiR-196b repression delays leukemogenesis in MOLM13 cell transplantation**

269 miR-196b functions downstream of *HOTTIP*, and together they coordinate to repress *FAS*  
270 tumor suppressor in MOLM13 cells. We previously showed that transplantation of  
271 *HOTTIP*<sup>-/-</sup> MOLM13 cells into irradiated NSG mice delayed leukemogenesis compared  
272 to WT MOLM13 cells. To further assess the function of miR-196b downstream of *HOTTIP*  
273 in leukemogenesis *in vivo*, we knocked down miR-196b in MOLM13-YFP-luciferase cells  
274 and then transplanted them into immunodeficient NOD-scid IL2rynull (NSG) mice for

275 luciferase-based imaging of leukemogenic burden over time and, ultimately, survival  
276 analysis. Inhibition of miR-196b inhibited leukemia cell engraftment, whereas  
277 transplantation of WT MOLM13-YFP-luc cells showed remarkable expansion *in vivo*  
278 (Figure 7A, B, C). We found that depletion of miR196b resulted in elongated survival (19  
279 days, OS), whereas mice receiving WT MOLM13 cells died on day 15 (overall survival,  
280 OS) (Figure 7D). The spleen size was dramatically smaller in mice receiving miR-196b  
281 KD MOLM13-YFP-luc cells than in mice receiving WT MOLM13-YFP-luc cells (Figure  
282 7E). Fluorescence-activated cell sorting (FACS) analysis showed that CD45+ bone  
283 marrow (BM) and spleen cells were drastically reduced in mice receiving miR-196b KD  
284 cells compare to WT cells (Figure 7F). Thus, miR-196b functions downstream of *HOTTIP*  
285 and coordinates with the lncRNA to repress FAS signaling, and miR-196b inhibition  
286 reduces the AML leukemia burden *in vivo* (Figure 7G).

287

## 288 **Discussion**

289

290 Long-non-coding RNAs (lncRNAs) and microRNAs (miRNAs) have emerged as  
291 biomarkers, drivers, and potential therapeutic targets for a wide array of complex  
292 disorders, including leukemia<sup>16</sup>. A growing number of publications demonstrate that  
293 miRNAs interact with lncRNAs thereby influencing their target gene expression<sup>21</sup>. The  
294 role of lncRNAs in gene silencing is well established; however, less is known about their  
295 function in active genomic loci where miRNAs are transcribed<sup>5</sup>. *HOTTIP* (*HOXA* transcript  
296 at the distal TIP), a lncRNA, has been known to interact with WDR or WDR/MLL protein  
297 complex to epigenetically regulate the 5' *HOXA* gene by methylating histone H3K4, which

298 is associated with active transcription. Recent studies from our laboratory combining a  
299 variety of molecular biology and bioinformatics techniques have revealed the regulatory  
300 networks activated by *HOTTIP* in malignant hematopoiesis and acute myeloid leukemia.  
301 Depletion of *HOTTIP* effectively inhibited the posterior HOXA genes (*HOXA9-HOXA13*),  
302 and its inhibitory effects gradually diminished on genes towards the anterior end (*HOXA1-*  
303 *HOXA7*)<sup>11,22</sup>. However, whether miRNA genes are regulated by *HOTTIP* in a similar  
304 manner to protein coding genes remained a question relevant to hematopoiesis and  
305 leukemogenesis. LncRNA can influence miRNA function in many ways: (1) lncRNAs can  
306 serve as a source to produce mature miRNAs (2) lncRNAs act as sponge, binding miRNA  
307 to prevent them from repressing their target mRNA genes and (3) lncRNA alter miRNA  
308 gene transcription by binding on their promoter<sup>16</sup>. To profile *HOTTIP* regulated miRNA in  
309 MOLM13 cells, we carried out small RNA sequencing that revealed that loss of *HOTTIP*  
310 significantly affects expression of several miRNAs when comparing WT and *HOTTIP*<sup>-/-</sup>  
311 MOLM13 AML cells. Intriguingly, several ncRNAs, including lncRNAs and miRNAs, are  
312 transcribed from the intergenic regions of the HOX clusters. However, it remains unknown  
313 how *HOTTIP* may mediate ncRNA transcription, particularly of miRNAs, and how the  
314 *HOTTIP*-miRNA axis governs gene expression in malignant hematopoiesis.

315 *HOXA9* expression is positively regulated by mixed lineage leukemia (MLL)  
316 methyltransferase, which trimethylates histone 3 lysine 4 (H3K4me3) at the *HOXA9*  
317 promoter<sup>23</sup>. This mechanism is directly antagonized by the sequential activity of polycomb  
318 repressive complexes PRC1 and PRC2 that trimethylated histone 3 lysine 27  
319 (H3K27me3). Moreover, topologically associating domains (TAD) of the HOX loci within  
320 the nucleus also have an important role in coordinating expression. Long non-coding RNA

321 *HOTTIP* interacts with the WDR5-MLL complex and localizes the complex to the 5'*HOXA*  
322 locus. To determine whether *HOTTIP* provides a basis for transcriptional activation and  
323 three-dimensional (3D) chromatin organization in posterior HOX gene loci, we screened  
324 all CTCF sites and lncRNAs important for *HOXA9* expression within all four HOX gene  
325 loci in *MLL-AF9* rearranged MOLM13 AML cells using a CRISPR/CAS9 lentivirus  
326 screening library<sup>11,24</sup>. The *HOTTIP* lncRNA acts downstream of the *CBS7/9* boundary to  
327 regulate expression of genes located in *cis* and *trans*, including *HOXA13-HOXA9*, *MEIS1*,  
328 and *RUNX1*, which are important for hematopoiesis, and leukemia<sup>11</sup>. Furthermore,  
329 ChIRP-seq analysis revealed that *HOTTIP* binds to its target genes<sup>11</sup> and a cohort of  
330 miRNAs. This data raises the question of whether *HOTTIP* also controls the expression  
331 of miRNAs that are involved in the management of malignant hematopoiesis.

332 Our analysis demonstrated that inhibition of *HOTTIP* in MOLM13 cells significantly  
333 inhibited several miRNAs, including HOX cluster miRNA, miR-196b, which targets both  
334 oncogenic *HOXA9* and the *FAS* tumor suppressor. Expression profiling of primary AML  
335 patient samples showed strong correlation among miRNA, *HOTTIP*, and their target HOX  
336 genes. Furthermore, ATAC-seq (assay for transposase-accessible chromatin using  
337 sequencing) data analysis defined chromatin signatures at differentially expressed  
338 miRNAs bound by *HOTTIP* in *cis* and *trans*, including HOX clusters miR-196b. *HOTTIP*  
339 binding on the promoter region of miRNAs that are differential expressed in *HOTTIP*<sup>-/-</sup>  
340 MOLM13 cells suggests that *HOTTIP* directly controls transcriptional regulation of  
341 miRNAs.

342 Dynamics of chromosomal structure play important roles in gene control. A number  
343 of proteins modulate chromatin dynamics by contributing to structural interactions

344 between gene promoters and their enhancer elements. Enhancer/promoter  
345 communications for specific transcription programs are enabled by topological associated  
346 domains (TADs), which are basically structural and functional chromosomal units. Often  
347 inappropriate promoter/enhancer interactions result from altered TADs, which lead to  
348 aberrant transcription of oncogenes or tumor suppressor genes. Binding of transcription  
349 factor CTCF in chromatin boundaries plays an important role in defining TADs and  
350 chromatin signature within TADs. We previously reported that CTCF binding located in  
351 between of *HOXA7* and *HOXA9* defines posterior HOXA locus TADs and chromatin  
352 signature within the TADs. Deletions of *CBS7/9* impaired chromatin structure and altered  
353 posterior HOXA gene expression due to lacking function of *HOTTIP* lncRNA<sup>11</sup>. By virtue  
354 of *CBS7/9*'s role in regulating posterior HOXA genes and lncRNA *HOTTIP* expression,  
355 we show that HOX cluster miRNAs are altered in *CBS7/9*<sup>-/-</sup> and that *HOTTIP* over-  
356 expression restored *CBS7/9*-mediated HOX cluster miRNA expression and chromatin  
357 signature. Apart from the cis coding miR-196b, *HOTTIP* lncRNA also bound and regulated  
358 *trans* HOX and non-HOX cluster miRNAs.

359 To decipher the mechanisms by which *HOTTIP* exerts miRNAs to control target  
360 genes, we performed bioinformatics analysis that revealed a large number of differentially  
361 expressed genes in *HOTTIP*<sup>-/-</sup> MOLM13 cells, which are co-regulated by *HOTTIP* and  
362 miR-196b. Although *HOTTIP* positively regulates expression of their co-expressed  
363 oncogenes, several of them are negatively regulated by miR-196b. Thus, it seems that  
364 negative regulation of the co-expressed 5' HOXA genes in MOLM13 cells might be fine-  
365 tuned by miR-196b in normal hematopoiesis<sup>18</sup>. Notably, single miRNA (or groups of  
366 miRNAs) target multiple genes including oncogenes and tumor suppressors



367 simultaneously or sequentially. Partial repression of *HOXA9* and *MEIS1* by miR-196b in  
368 the human *MLL*-rearranged leukemia may not potent enough to affect their function to  
369 induce and maintain leukemia. The tumor suppressor targets (e.g., *FAS*) of miR-196b  
370 could significantly inhibit cell transformation and leukemogenesis. Indeed, miR-196b  
371 inhibition induced *FAS* expression and *Cleaved Caspase-3*. As a result, the apoptotic cell  
372 death increased upon miR-196b knockdown in MOLM13 cells. Similarly, induced  
373 expression of *FAS* and *Cas3* in *HOTTIP*<sup>-/-</sup> and *CBS7/9*<sup>-/-</sup> is associated with increased  
374 cell death. *HOTTIP* modulates epigenetic marks on the *FAS* promoter and thereby  
375 controls chromatin accessibility and gene expression. However, *HOTTIP* represses *FAS*  
376 expression perhaps through activation of miR-196b that directly targets *FAS*. miR-196b-  
377 deficient MOLM13 cell transplantation in NSG mice delayed leukemogenesis. All mice  
378 transplanted with WT MOLM13 cells died within 15 days, while mice receiving miR-196b-  
379 depleted cells survived longer and exhibited fewer CD45<sup>+</sup> cells. Transgenic  
380 overexpression of *HOTTIP* lncRNA in mice affected HSC function and increased  
381 leukemia stem cell (LSC) pool, inducing leukemia-like disease<sup>11</sup>. Thus, *HOTTIP* and miR-  
382 196b deletion reduces the AML leukemic burden *in vivo*, and both coordinate to regulate  
383 *FAS* expression at the transcriptional and post-transcriptional level to promote  
384 leukemogenesis.

385 Taken together, we report a mechanism mediated by *HOTTIP* to regulate miR-  
386 196b expression in AML. Our study revealed a regulatory model in which *HOTTIP*-miR-  
387 196b axis repress expression of tumor suppressor *FAS* that circumvent the negative  
388 effects of *HOXA9* repression by miR-196b in AML. The aberrant upregulation of both  
389 *HOTTIP* and miR-196b by *MLL* fusion results in the persistent repression of its tumor-

390 suppressor targets (e.g., *FAS*) along with dual control (transactivation and inhibition) of  
391 their oncogenic co-targets (*HOXA9/MEIS1*). This inhibits differentiation, disrupts cell  
392 homeostasis, and promotes cell proliferation via inhibiting apoptosis, consequently  
393 maintaining leukemia stem cell pools. Apart from miR-196b, *HOTTIP* also bound and  
394 regulated a subset of non-HOX cluster miRNAs while a subset of miRNAs was  
395 upregulated in *HOTTIP*-inhibited MOLM13 cells. Future studies should aim to investigate  
396 the mechanism by which *HOTTIP* modulates expression of candidate miRNA in  
397 hematopoiesis vs leukemia.

398

## 399 **Figure Legends**

400

401 **Figure 1. LncRNA-*HOTTIP* regulates miRNAs target genes control leukemogenic**  
402 **program in AML cells.** (A) Principal component analysis (PCA) of the miRNAs  
403 differentially expressed in *HOTTIP*<sup>-/-</sup> vs WT AML cells. (B) Heatmap of miRNAs changed  
404 >2-fold up- and down upon *HOTTIP*<sup>-/-</sup> by small-RNA sequencing (smRNA-seq). (C)  
405 Select number of mRNAs up- and down regulated in *HOTTIP*<sup>-/-</sup> MOLM13 cells. (D) GO  
406 (Gene Ontology) analysis of miRNAs differentially expressed in *HOTTIP*<sup>-/-</sup> cells. (E)  
407 Number of genes regulated by either miRNAs or *HOTTIP*. (F) Select number of DEGs in  
408 *HOTTIP*<sup>-/-</sup> are the direct target of miRNAs that are regulated by *HOTTIP*.

409

410 **Figure 2. *HOTTIP*<sup>-/-</sup> perturbs HOX-cluster miRNAs, mediate oncogenic program.** (A)  
411 Schematics represent HOX cluster coding and non-coding genes. HOX genes are  
412 indicated as numbered boxes, miRNAs are shown as triangles and lncRNAs are

413 presented as rectangles. (B,) Expression level of HOX cluster miRNAs in WT and  
414 *HOTTIP*<sup>-/-</sup> MOLM13 cells. (C) Expression correlation between miR-196b, *HOTTIP*, and  
415 *HOXA* genes in *de novo* AML and normal control dataset. (D) Relative expression level  
416 of the indicated mRNAs, miRNAs and lncRNA in the MOLM13 cells. (F) Relative  
417 expression level of the indicated HOX cluster miRNAs in MOLM13 and KASUMI cells.

418

419 **Figure 3. *HOTTIP* controls the epigenetic modifications of HOX cluster miRNAs.** (A)

420 ChIRP-seq analysis shows *HOTTIP* binding on promoter region of miR196b in WT and  
421 *HOTTIP*<sup>-/-</sup> MOLM13 cells. (B, C, D, E, F) Enrichment of the active histone marks  
422 (H3K4me3 and H3K79me2) and repressive histone mark (H3K27me3) on genomic loci  
423 of the HOX cluster miRNAs. (G, H, I, J, K) ATAC-seq analysis shows chromatin  
424 accessibility on the HOX-cluster miRNAs upon *HOTTIP*<sup>-/-</sup> in MOLM13 cells, and WT cells.

425

426 **Figure 4. *CBS7/9* boundary regulates HOX cluster miRNAs chromatin**

427 **neighborhood.** (A) qRT-PCR analysis of HOX cluster miRNAs in WT, *CBS7/9*<sup>+/-</sup>, and  
428 *CBS7/9*<sup>+/-</sup>+*HOTTIP*-VP MOLM13 cells. (B) ATAC-seq analysis shows chromatin  
429 accessibility on the loci of HOX cluster miRNAs in WT, *CBS7/9*<sup>+/-</sup>, and dCas9-VP160-  
430 mediated *HOTTIP*-activated MOLM13 cells.

431

432 **Figure 5. Inhibition of miR-196b induced apoptosis in MOLM13 cells.** (A) qRT-PCR

433 analysis of miR-196b targets in MOLM13 cells treated with either negative control or  
434 locked nuclei acids (LNA) against miR-196b. (B) qRT-PCR analysis of miR-196b targets  
435 in MOLM13 cells treated with either mimics of specific miRNA or control. (C) Bar graph

436 shows FACS (florescence activated cell sorting) evaluated percentage of annexin stained  
437 apoptotic population of MOLM13 cells in control and miR-196b knockdown groups.

438

439 **Figure 6. *HOTTIP* targets *FAS*, and *CBS7/9* boundary play role in maintaining the**

440 ***HOTTIP* targets-chromatin neighborhood.** (A) qRT-PCR of the genes associated with

441 apoptosis in WT and *HOTTIP*<sup>-/-</sup> MOLM13 cells. (B) Expression level of *Caspase* genes

442 in WT, *CBS7/9*<sup>+/-</sup>, and dCas9-VP160-mediated *HOTTIP*-activated MOLM13 cells. (C)

443 Western blot shows protein level of  $\beta$ -actin and Cleaved Caspase-3 in WT, *CBS7/9*<sup>+/-</sup>,

444 and dCas9-VP160-mediated *HOTTIP*-activated MOLM13 cells. (D) Bar graph shows

445 percentage of FACS evaluated annexin stained apoptotic population in WT and *HOTTIP*<sup>-/-</sup>

446 <sup>-/-</sup> MOLM13 cells. (E) ChIP-seq analysis shows histone marks enrichment on the *FAS*

447 promoter in WT and *HOTTIP*<sup>-/-</sup> MOLM13 cells. (F) ATAC-seq analysis of chromatin

448 accessibility on the *FAS* promoter in WT and *HOTTIP*<sup>-/-</sup> MOLM13 cells. (G) ATAC-seq

449 analysis of chromatin accessibility on the *FAS* promoter in WT, *CBS7/9*<sup>+/-</sup>, and dCas9-

450 VP-160-mediated *HOTTIP*-activated MOLM13 cells.

451

452 **Figure 7. Inhibition of miR-196b inhibits *in vivo* leukemogenesis.** (A) Schematic

453 representation of the MOLM13 transplantation in NSG mice and imaging. Luciferase

454 expressing MOLM13 cells either WT or miR196b KD were injected into NSG mice,

455 followed by *in vivo* imaging to assess the knockdown effects of miR-196b in

456 leukemogenesis (B, C) Representative images of leukemogenesis in NSG mice

457 transplanted with MOLM13 cells treated with either LNA196b or negative control. (D)

458 Overall survival (OS) of NSG mice injected with MOLM13 cells. (E) Images of spleens of

459 NSG mice 12 days after transplantation with MOLM13 cells treated with either LNA196B or  
460 neg control. (F) Human CD45<sup>+</sup> cells from bone marrow (BM) and spleen isolated 12 days  
461 after transplantation were analyzed by FACS. (G) Model of HOTTIP/miR26b regulation  
462 of AML. HOTTIP activation in MLLr<sup>+</sup> AML activates expression of *HOXA9*, *MEIS1*, and  
463 miR296b and suppresses *FAS*. miR296b, in turn, represses *HOTTIP* target gene to  
464 maintain a proliferative state and drive leukemogenesis. In the absence of *HOTTIP*, these  
465 pathways are inactive, therefore, *HOXA9* and *MEIS1* levels decrease, and *FAS* levels  
466 increase, resulting in leukemic cells undergoing apoptosis.

467

## 468 **Supplementary Figures**

469

470 **Supplementary Figure 1.** UCSC gene track shows transcription factor binding motifs on  
471 the miR-196b genomic locus and posterior HOXA genes.

472

473 **Supplementary Figure 2.** FACS analysis of annexin stained cells upon knockdown of  
474 miR-196b, and control.

475

476 **Supplementary Figure 2.** FACS analysis of annexin stained *HOTTIP*<sup>-/-</sup> and wild type  
477 MOLM13 cells.

478

479 **Supplementary Figure 2.** FACS analysis of CD45 stained bone marrow and spleen cells,  
480 harvested from NSG mice transplanted with either WT or miR-196b knocked down miR-  
481 196b MOLM13 cells.

482

483

## 484 **Material and Methods**

485

### 486 **Tissue and Cell culture**

487 MOLM13 cells were cultured and maintained in RPMI medium supplemented with 10%  
488 FBS and 1% penicillin and streptomycin solution. All medium and supplements were  
489 purchased from Thermo Fisher Scientific.

490

### 491 **SsecCRISPR-Cas9 Mediated *HOTTIP* IncRNA Knock-Out and Lentivirus Production**

492 The detailed protocol of generating *HOTTIP* knockout (KO) MOLM13 leukemia cells were  
493 described previously in Luo et. al. 2019. In brief, CRISPR-RNA (crRNA) and tracrRNA  
494 were mixed and annealed at 95°C for 5 min and the cooled down to room temperature.  
495 Subsequently, crRNA: tracrRNA duplex and S.p. Cas9 Nuclease components were  
496 combined together and then mixed with 500,000 AML cells for electroporation with Neon®  
497 System. The DNA was extracted after 24 hrs. or 96hrs. from 100ul of transfected cells  
498 using Qiagen Quick Extract kit and processed for Sanger sequencing for verification of  
499 mutation. The targeted deletion of *HOTTIP*: *HOTTIP*<sup>-/-</sup> -#1 targeted region is Chr7:  
500 27241953-27241985; *HOTTIP*<sup>-/-</sup> -#2 targeted region is Chr7: 27240098-27240123.

501

### 502 **dCas9-Mediated Overexpression of *HOTTIP* in AML Cells**

503 *HOTTIP* promoter targeting guide RNA was designed using the Zhang laboratory web  
504 tool (<http://crispr.mit.edu>), and cloned into lentiviral vector the pLKO5.sgRNA.EFS.tRFP

505 vector (Addgene #57824). The gRNA plasmid encoding puromycin was co-transfected  
506 with a plasmid encoding dCas9-VP160 (pAC94-pmax-dCas9VP160-2A-puro, addgene  
507 plasmid number #48226) in MOLM13 and OCI-AML3 cells. Transfected MOLM13 cells  
508 were selected with 2ug/ml puromycin for 48 hrs. post-transfection, and then FACS sorted  
509 for RFP<sup>+</sup> cells. RNA was extracted from RFP<sup>+</sup> cells, and gene expression was analyzed  
510 by qRT-PCR using specific primer sets (Luo et al. 2019).

511

### 512 **MiRNA Knockdown and Over Expression**

513 Locked Nucleic Acids (LNA) and miRNA mimics and scrambled LNA/mimic (negative  
514 control) was purchased from Qiagen and MOLM13 cells were transfected with either  
515 LONZA nucleofector devise (program X-001) or Lipofectamine 3000 (Invitrogen). Cells  
516 were harvested post 72 hrs. of transfection for RNA extraction and gene expression  
517 analysis.

518

### 519 **Western Blot Analysis**

520 Whole cell lysate extract (total protein) was prepared using RIPA buffer and quantified  
521 using Bradford method. Total protein lysates were fractionated on 4%-20% on tris-glycine  
522 polyacrylamide gradient gel and transferred onto PVDF membrane. The bot was exposed  
523 to specific antibodies to detect the endogenous protein level using chemiluminescence  
524 method and BioRad imaging system: anti-β-actin (A2066-100U); Sigma at 1: 5000, anti-  
525 Cleaved Caspase-3 (9661); Cell Signaling at 1:1000 dilution.

526

### 527 **Apoptosis Analysis**

528 MOLM13 cells transfected with either LNA against specific miRNA or scrambled non-  
529 targeting control were seeded and cultured in 6-well dishes. Cells were harvested 72hrs  
530 post transfection and washed with PBS. Apoptotic cells were detected by Accuri C6  
531 fluorescence-activated cell sorting (FACS) using Annexin V-APC Apoptosis Detection Kit  
532 (BD #), according to the manufacturers protocol.

533

#### 534 **RNA Extraction and Real-Time qPCR**

535 Norgen Biotek RNA purification kit was used to isolate total RNA as per manufacturer's  
536 instructions. cDNA (reverse transcription - RNA to cDNA) was made using High  
537 Capacity RNA to cDNA kit (Life Technologies, Grand Island, NY). miRNA and mRNA  
538 qPCR were performed using TaqMan (Life Technologies) and Sybr Green assay  
539 respectively with either Taqman Universal PCR Master Mix (miRNA qPCR) or BioRad  
540 SsoAdvanced Universal Sybr Green Supermix according to the manufacturer's protocol  
541 on a Bio-Rad CFX96 Touch Real Time PCR Detection System (Bio-Rad Laboratories,  
542 Richmond, CA). PCR reactions were performed in triplicate using either U6 (miRNA  
543 qPCR), or GAPDH (human messenger RNA qPCR) as the normalizer.

544

#### 545 **Small RNA library preparation and sequencing analysis**

546 The small RNA-seq of the MOLM13 WT and *HOTTIP*<sup>-/-</sup> cells was conducted at Genome  
547 science Facility, Pennsylvania State University College of Medicine. Small RNA-seq.  
548 libraries were prepared using BioO from Perkin Elmer and Qiagen kits. Small RNAs were  
549 sequenced using a TruSeq Small RNA Sequencing Kit (Illumina, San Diego, CA, USA)  
550 according to manufacturer instructions. The quality of libraries was assessed based on



551 size distribution and concentration using 2100 Bioanalyzer with DNA 1000 chip (Agilent  
552 Technologies. All samples were sequenced 25M reads on an Illumina NovaSeq 6000  
553 Sequencer using the 2x50bp paired-end platform.

554 All of raw binary base call files from the sequencer were transformed into FASTQ format  
555 and de-multiplexing using Illumina bcl2fastq2 Conversion Software v2.20  
556 (<https://support.illumina.com/downloads/bcl2fastq-conversion-software-v2-20.html>).

557 Quality of the sequenced reads was evaluated using FastQC developed by Babraham  
558 Bioinformatics (<https://www.bioinformatics.babraham.ac.uk/projects/fastqc/>). Then these  
559 fastq files were performed by adapter trimming using the FASTQ Toolkit App version 1.0  
560 of Illumina BaseSpace (<http://basespace.illumina.com/apps/>) and sequence alignment  
561 with GRCh37 human genome assembly database using OASIS2.0  
562 (<https://oasis.dzne.de/index.php>).

563 Differential expression analysis was performed using the DESeq2 algorithm<sup>25</sup> and the  
564 expression was normalized using de Variance Stabilizing Transformation from the  
565 DESeq2 algorithm in R. The differential expression of miRs with adjusted  $p$  values  $< 0.05$ ,  
566 and fold change (FC) $\geq 2$  representing positive  $\log_2FC$  ( $>1.0$ ) and negative  $\log_2FC$  ( $<-1.0$ )  
567 were considered to be significantly different.

568 The potential targets of miRs were derived from the miRTarBase<sup>26</sup> in human genome  
569 (<http://mirtarbase.cuhk.edu.cn/php/index.php>). Raw sequencing data and miRNA  
570 quantification tables can be accessed through **GEO record** #.

571

572 **Chromatin Immunoprecipitation (ChIP) Assay**

573 ChIP were performed as described in Luo et. al., 2019. Briefly, chromatin prepared from  
574 MOLM13 cells were immunoprecipitated with antibodies against MLL1, H3K4me3,  
575 H3K9me2, H3K27me3, and H3K79me2, separately. The MLL1, H3K4me3, H3K79me2  
576 and H3K27me3, H3K79me2 ChIP-DNA libraries were prepared using illumina's TruSeq  
577 ChIP Sample Preparation Kit according to the manufacturers' instructions (Cat # IP-202-  
578 1012). Agilent TapeStation was used to check the quality of the libraries as per  
579 manufacturer's instruction. Final libraries were submitted to paired-end sequencing of 100  
580 bp length on an Illumina HiSeq 3000.

581

### 582 **Chromatin Isolation by RNA Immunoprecipitation (CHIRP) Assay**

583 The detailed methods of CHIRP assay were described in Luo et. al. 2019, briefly  
584 sonicated chromatin materials diluted using hybridization buffer and hybridized with  
585 100pmol of biotinylated DNA probes targeting *HOTTIP* or *LacZ* containing 100 mL of  
586 Streptavidin-magnetic C1 beads (Invitrogen). RNA and DNA hybrids and RNA binding  
587 proteins were subjected to analysis by qRT-PCR and western blot with respective  
588 antibodies respectively. Illumina's TruSeq ChIP Sample Preparation Kit was used  
589 according to manufacturer's instructions for preparation of CHIRP libraries and submitted  
590 to paired-end sequencing of 100 bp length on an Illumina HiSeq 2500. All sequencing  
591 genomics datasets were deposited in the NCBI GEO under accession number  
592 (GSE114981).

593

### 594 **ChIP-seq and ChIRP-seq Data Analysis**

595 ChIP-seq and ChIRP-seq data processing and analysis was described in Luo et. al. 2019.  
596 Briefly, all sequencing tracks were viewed using the Integrated Genomic Viewer  
597 (Robinson et al., 2011). Peaks annotation was carried out with the command  
598 “annotatePeaks.pl” from HOMER package (Heinz et al., 2010). For ChIRP-seq motif  
599 analysis, the *de novo* motif analysis was performed by the “findmotifsgenome.pl” from  
600 the HOMER motif discovery algorithm (Heinz et al., 2010). The genes and pathways  
601 regulated by the *HOTTIP* bound promoters or intergenic regions were analyzed and  
602 annotated by the Gene Ontology analysis with the Database for Annotation, Visualization  
603 and Integrated Discovery (DAVID) tool (<https://david.ncifcrf.gov/>, Version 6.8) (Huang da  
604 et al., 2009a; Huang da et al., 2009b). Each GO term with a p value more than  $1 \times 10^{-3}$   
605 is used for cutoff (threshold:  $10^{-3}$ ). All genomics datasets were deposited in the NCBI  
606 GEO under accession number (GSE114981).

607

### 608 **Assay for Transposase-Accessible Chromatin Using Sequencing (ATAC-seq)**

609 ATAC-seq was previously described in Luo et. al. 2019 using the Nextera DNA library  
610 preparation kit. Libraries were quantified using qPCR (Kapa Library Quantification Kit for  
611 Illumina, Roche), and purified with AMPure beads (Beckman Coulter). Quality of the DNA  
612 library was examined by Agilent bio-analyzer 2100 prior to sequencing in duplicates with  
613 2x100 bp paired-end reads on an Illumina NextSeq 500.

614

### 615 **ATAC-seq Analysis**

616 Detailed method of ATAC-seq analysis was previously described in Luo et. al. 2019.  
617 Briefly, all sequencing tracks were viewed using the Integrated Genomic Viewer

618 (IGV/2.4.19) (Robinson et al., 2011). Peaks annotation was carried out with the command  
619 “annotatePeaks.pl” from HOMER package (version 4.8) (Heinz et al., 2010) and GREAT  
620 (McLean et al., 2010). DEseq2 (Benjamini-Hochberg adjusted  $p < 0.05$ ; FoldChangeR2)  
621 were also performed to find the differential binding sites between two peak files, including  
622 control and treatment groups with C+G normalized and “reads in peaks” normalized data  
623 (Ross-Innes et al., 2012). The *de novo* motif analysis was performed by the  
624 “findmotifsgenome.pl” from the HOMER package (Heinz et al., 2010). For each genomic  
625 feature (peaks or chromVAR annotation), we calculated the chromatin accessibility  
626 median deviation z-score (for chromVAR features) or fragment counts (for peaks) in  
627 control and treatment groups with chromVAR package in R language (Rubin et al., 2019;  
628 Schep et al., 2017). Pearson’s correlation coefficient and Pearson’s  $\chi^2$ -test were carried  
629 out to calculate overall similarity between the replicates of ATAC-seq global open  
630 chromatin signatures. All genomics datasets were deposited in the NCBI GEO under  
631 accession number (GSE114981).

632

### 633 **Xenotransplantation of Human Leukemic Cells and Patient-Derived Xenografts** 634 **(PDX)**

635 MOLM13 cells - WT or miR-196b KD were injected into the tail vein of the NSG mice (2-  
636 3 months old). Cells were resuspended into DPBS and injected at  $5 \times 10^5$  cells (in 150 to  
637 200ul DPBS) per mouse. Mice were monitored daily for symptoms of disease (ruffled  
638 coat, hunched back, weakness and reduced motility) to determine the time of killing for  
639 injected mice with sign of distress. Experimentally used NSG mice were humanely killed  
640 at the time of moribund. Blood was collected into microtubes for automated process with

641 K<sub>2</sub>EDTA. bone (tibias, femurs and pelvis) and spleen were dissected. BM cells were  
642 isolated by flushing the bones. Spleens were mashed through a 70-mm mesh filter and  
643 made into single cell suspensions. Human CD45 (BD #) chimerism in these hematopoietic  
644 tissues was analyzed by Accuri C6 flow cytometry.

645

## 646 **Acknowledgements**

647

648 This work was supported by the grants from National Institutes of Health (S.H.,  
649 R01DK110108, R01CA204044, HL141950)

650

## 651 **Author Contributions**

652

653 A.P.S., H.L., and S.H. conceptualized the study and formal data analysis. A.P.S. designed  
654 and performed the experiments. H.L. and M.E. contributed bioinformatics analysis. M.M.  
655 helped with qRT-PCR. A.P.S. and A.S. performed mouse transplantation studies. Writing-  
656 original draft, A.P.S., Review and editing, A.P.S., H.L., M.E., S.H., Visualization, A.P.S.,  
657 H.L., M.E., S.H., Project supervision, A.P.S. and S.H...

658

## 659 **References**

660

- 661 1 He, R. Z., Luo, D. X. & Mo, Y. Y. Emerging roles of lncRNAs in the post-transcriptional  
662 regulation in cancer. *Genes Dis* **6**, 6-15, doi:10.1016/j.gendis.2019.01.003 (2019).
- 663 2 Dey, B. K., Mueller, A. C. & Dutta, A. Long non-coding RNAs as emerging regulators of  
664 differentiation, development, and disease. *Transcription* **5**, e944014,  
665 doi:10.4161/21541272.2014.944014 (2014).

- 666 3 Lambert, M. *et al.* Direct and Indirect Targeting of HOXA9 Transcription Factor in Acute  
667 Myeloid Leukemia. *Cancers (Basel)* **11**, doi:10.3390/cancers11060837 (2019).
- 668 4 Collins, C. T. & Hess, J. L. Dereglulation of the HOXA9/MEIS1 axis in acute leukemia. *Curr*  
669 *Opin Hematol* **23**, 354-361, doi:10.1097/MOH.0000000000000245 (2016).
- 670 5 Long, Y., Wang, X., Youmans, D. T. & Cech, T. R. How do lncRNAs regulate transcription?  
671 *Sci Adv* **3**, eaao2110, doi:10.1126/sciadv.aao2110 (2017).
- 672 6 Grossi, E. *et al.* A lncRNA-SWI/SNF complex crosstalk controls transcriptional activation at  
673 specific promoter regions. *Nat Commun* **11**, 936, doi:10.1038/s41467-020-14623-3  
674 (2020).
- 675 7 Singh, A. P. & Archer, T. K. Analysis of the SWI/SNF chromatin-remodeling complex during  
676 early heart development and BAF250a repression cardiac gene transcription during P19  
677 cell differentiation. *Nucleic Acids Res* **42**, 2958-2975, doi:10.1093/nar/gkt1232 (2014).
- 678 8 Singh, A. P. *et al.* Brg1 Enables Rapid Growth of the Early Embryo by Suppressing Genes  
679 That Regulate Apoptosis and Cell Growth Arrest. *Mol Cell Biol* **36**, 1990-2010,  
680 doi:10.1128/MCB.01101-15 (2016).
- 681 9 Singh, A. P. *et al.* A role for BRG1 in the regulation of genes required for development of  
682 the lymphatic system. *Oncotarget* **8**, 54925-54938, doi:10.18632/oncotarget.18976  
683 (2017).
- 684 10 Basta, J. M. *et al.* The core SWI/SNF catalytic subunit Brg1 regulates nephron progenitor  
685 cell proliferation and differentiation. *Dev Biol*, doi:10.1016/j.ydbio.2020.05.008 (2020).
- 686 11 Luo, H. *et al.* HOTTIP lncRNA Promotes Hematopoietic Stem Cell Self-Renewal Leading to  
687 AML-like Disease in Mice. *Cancer Cell* **36**, 645-659 e648, doi:10.1016/j.ccell.2019.10.011  
688 (2019).
- 689 12 Singh, A. P. *et al.* Enteroendocrine Progenitor Cell-Enriched miR-7 Regulates Intestinal  
690 Epithelial Proliferation in an Xiap-Dependent Manner. *Cell Mol Gastroenterol Hepatol* **9**,  
691 447-464, doi:10.1016/j.jcmgh.2019.11.001 (2020).
- 692 13 Fernandes, J. C. R., Acuna, S. M., Aoki, J. I., Floeter-Winter, L. M. & Muxel, S. M. Long Non-  
693 Coding RNAs in the Regulation of Gene Expression: Physiology and Disease. *Noncoding*  
694 *RNA* **5**, doi:10.3390/ncrna5010017 (2019).
- 695 14 Furio-Tari, P., Tarazona, S., Gabaldon, T., Enright, A. J. & Conesa, A. spongeScan: A web  
696 for detecting microRNA binding elements in lncRNA sequences. *Nucleic Acids Res* **44**,  
697 W176-180, doi:10.1093/nar/gkw443 (2016).
- 698 15 Dykes, I. M. & Emanuelli, C. Transcriptional and Post-transcriptional Gene Regulation by  
699 Long Non-coding RNA. *Genomics Proteomics Bioinformatics* **15**, 177-186,  
700 doi:10.1016/j.gpb.2016.12.005 (2017).
- 701 16 Wallace, J. A. & O'Connell, R. M. MicroRNAs and acute myeloid leukemia: therapeutic  
702 implications and emerging concepts. *Blood* **130**, 1290-1301, doi:10.1182/blood-2016-10-  
703 697698 (2017).
- 704 17 Yendamuri, S. & Calin, G. A. The role of microRNA in human leukemia: a review. *Leukemia*  
705 **23**, 1257-1263, doi:10.1038/leu.2008.382 (2009).
- 706 18 Li, Z. *et al.* miR-196b directly targets both HOXA9/MEIS1 oncogenes and FAS tumour  
707 suppressor in MLL-rearranged leukaemia. *Nat Commun* **3**, 688, doi:10.1038/ncomms1681  
708 (2012).

- 709 19 Mo, J. S. *et al.* MicroRNA 196B regulates FAS-mediated apoptosis in colorectal cancer  
710 cells. *Oncotarget* **6**, 2843-2855, doi:10.18632/oncotarget.3066 (2015).
- 711 20 Luo, H. *et al.* CTCF boundary remodels chromatin domain and drives aberrant HOX gene  
712 transcription in acute myeloid leukemia. *Blood* **132**, 837-848, doi:10.1182/blood-2017-  
713 11-814319 (2018).
- 714 21 Yamamura, S., Imai-Sumida, M., Tanaka, Y. & Dahiya, R. Interaction and cross-talk  
715 between non-coding RNAs. *Cell Mol Life Sci* **75**, 467-484, doi:10.1007/s00018-017-2626-  
716 6 (2018).
- 717 22 Wang, K. C. *et al.* A long noncoding RNA maintains active chromatin to coordinate  
718 homeotic gene expression. *Nature* **472**, 120-124, doi:10.1038/nature09819 (2011).
- 719 23 de Boer, J., Walf-Vorderwulbecke, V. & Williams, O. In focus: MLL-rearranged leukemia.  
720 *Leukemia* **27**, 1224-1228, doi:10.1038/leu.2013.78 (2013).
- 721 24 Luo, H. *et al.* CTCF boundary remodels chromatin domain and drives aberrant HOX gene  
722 transcription in acute myeloid leukemia. *Blood*, doi:10.1182/blood-2017-11-814319  
723 (2018).
- 724 25 Love, M. I., Huber, W. & Anders, S. Moderated estimation of fold change and dispersion  
725 for RNA-seq data with DESeq2. *Genome Biol* **15**, 550, doi:10.1186/s13059-014-0550-8  
726 (2014).
- 727 26 Chou, C. H. *et al.* miRTarBase update 2018: a resource for experimentally validated  
728 microRNA-target interactions. *Nucleic Acids Res* **46**, D296-D302,  
729 doi:10.1093/nar/gkx1067 (2018).
- 730

Figure 1

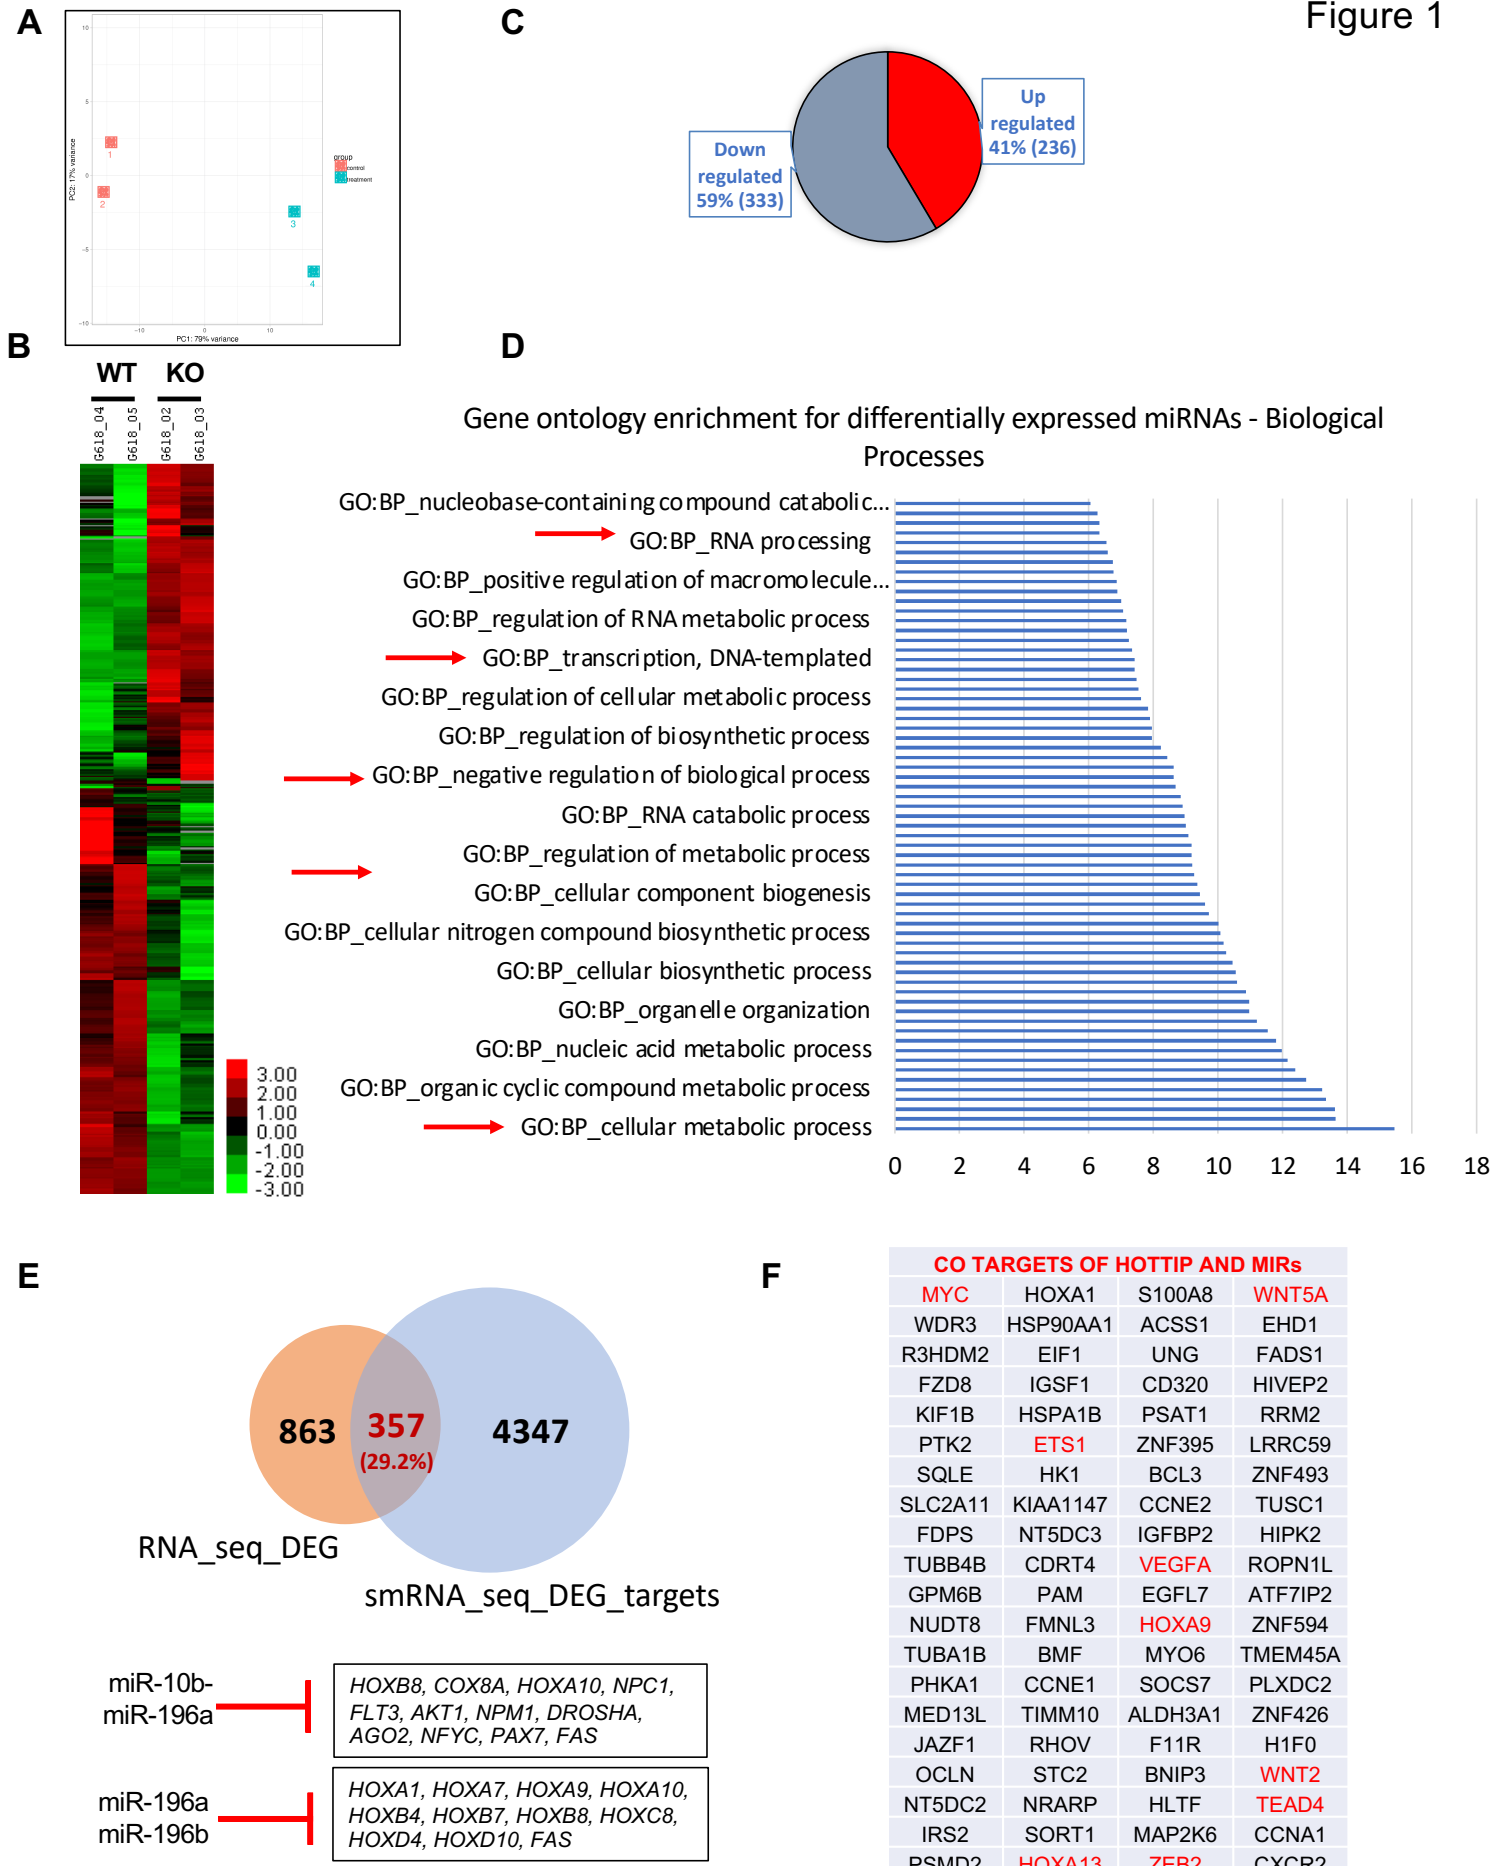



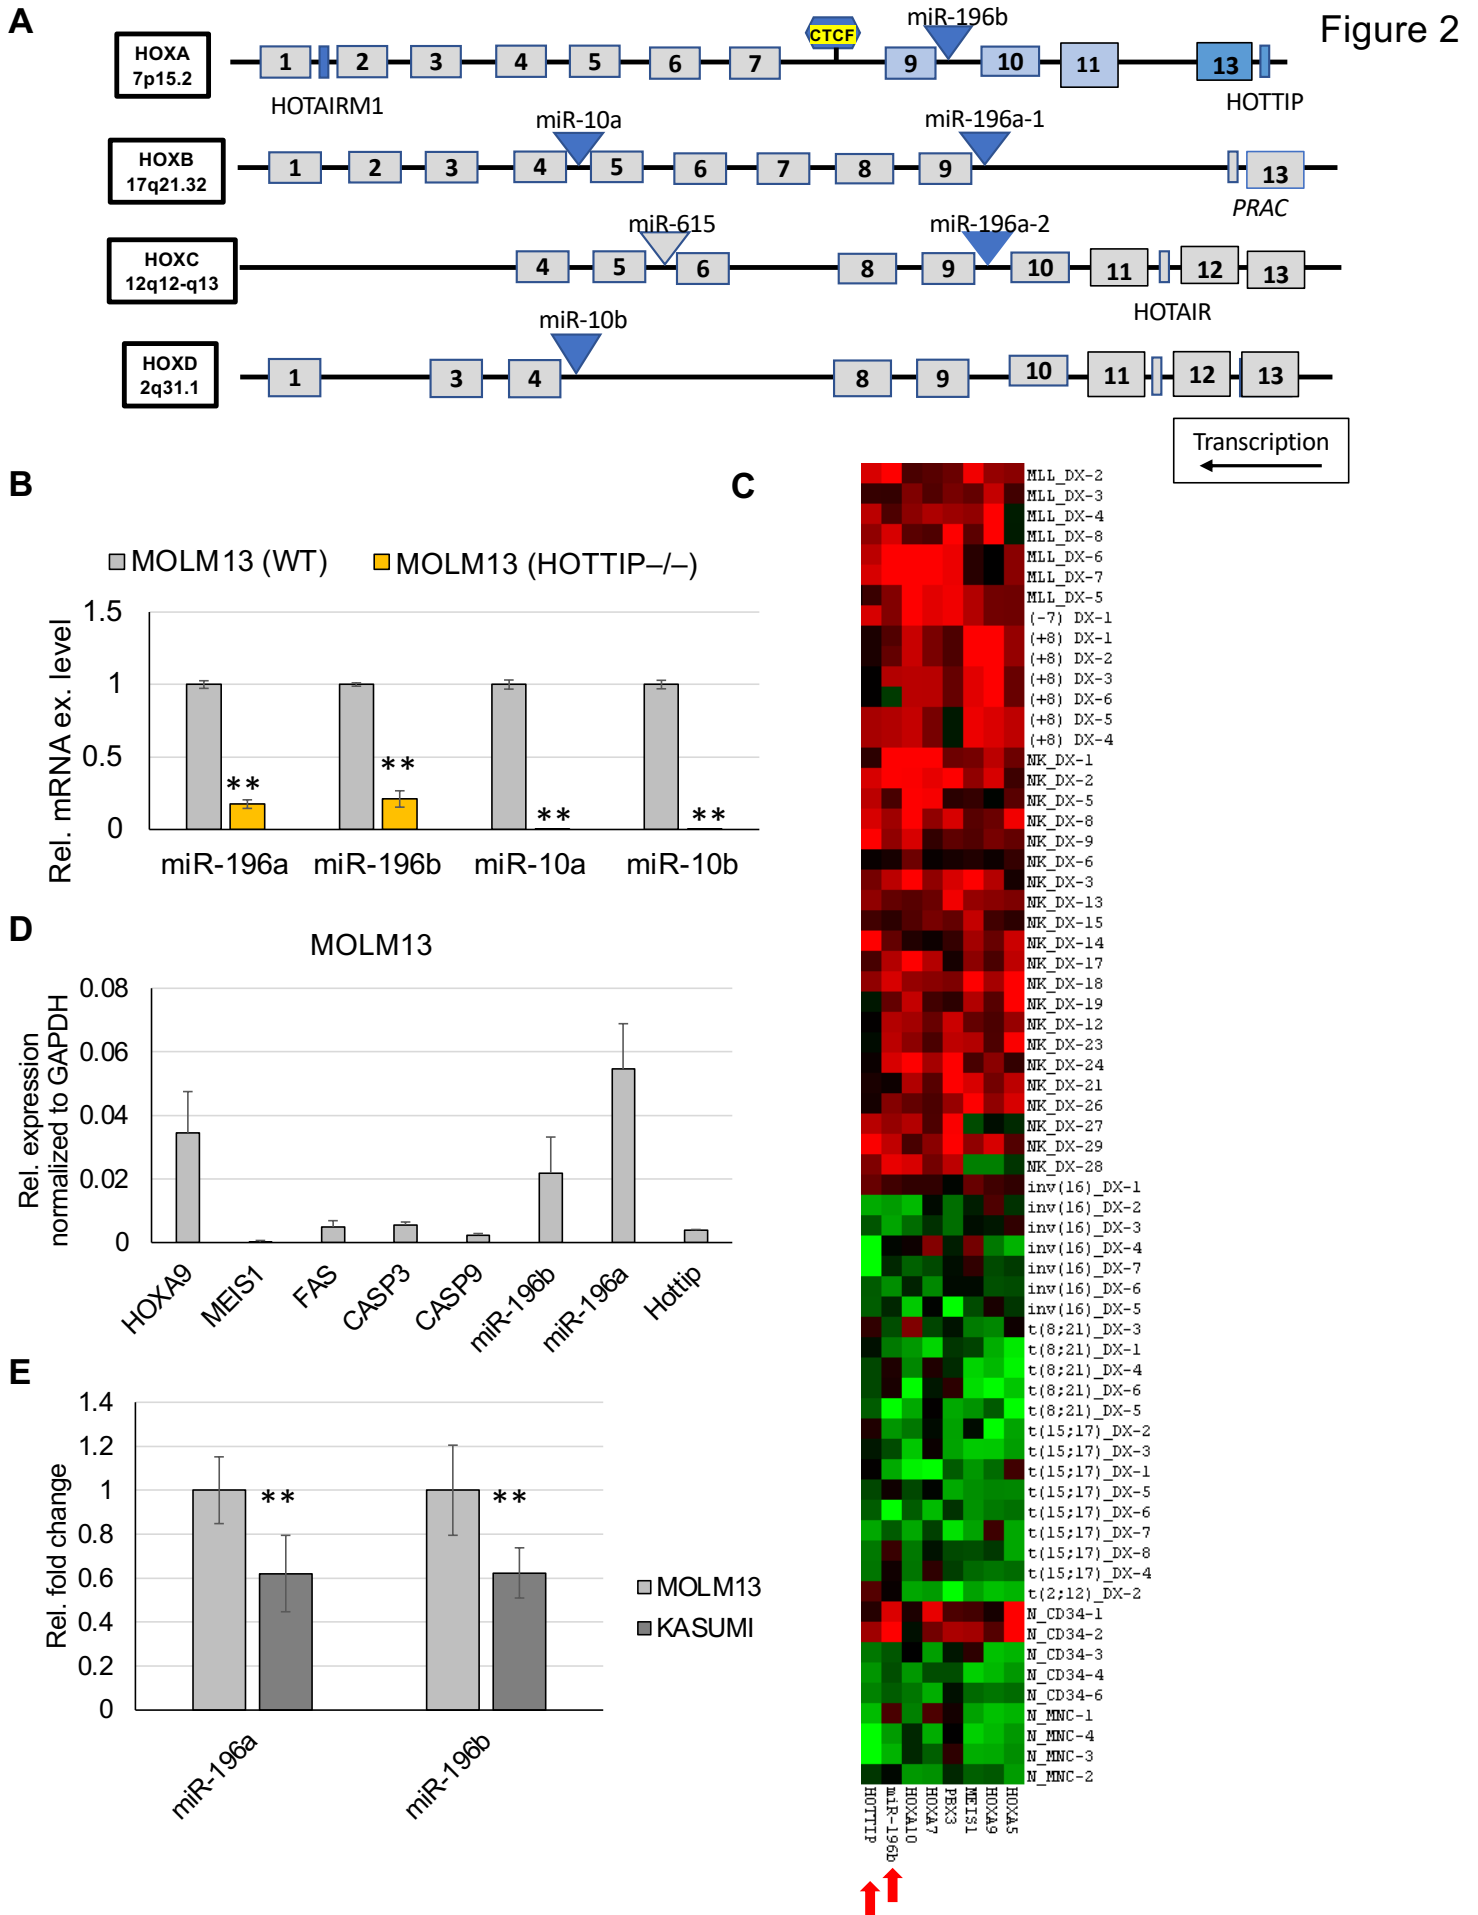

Figure 3

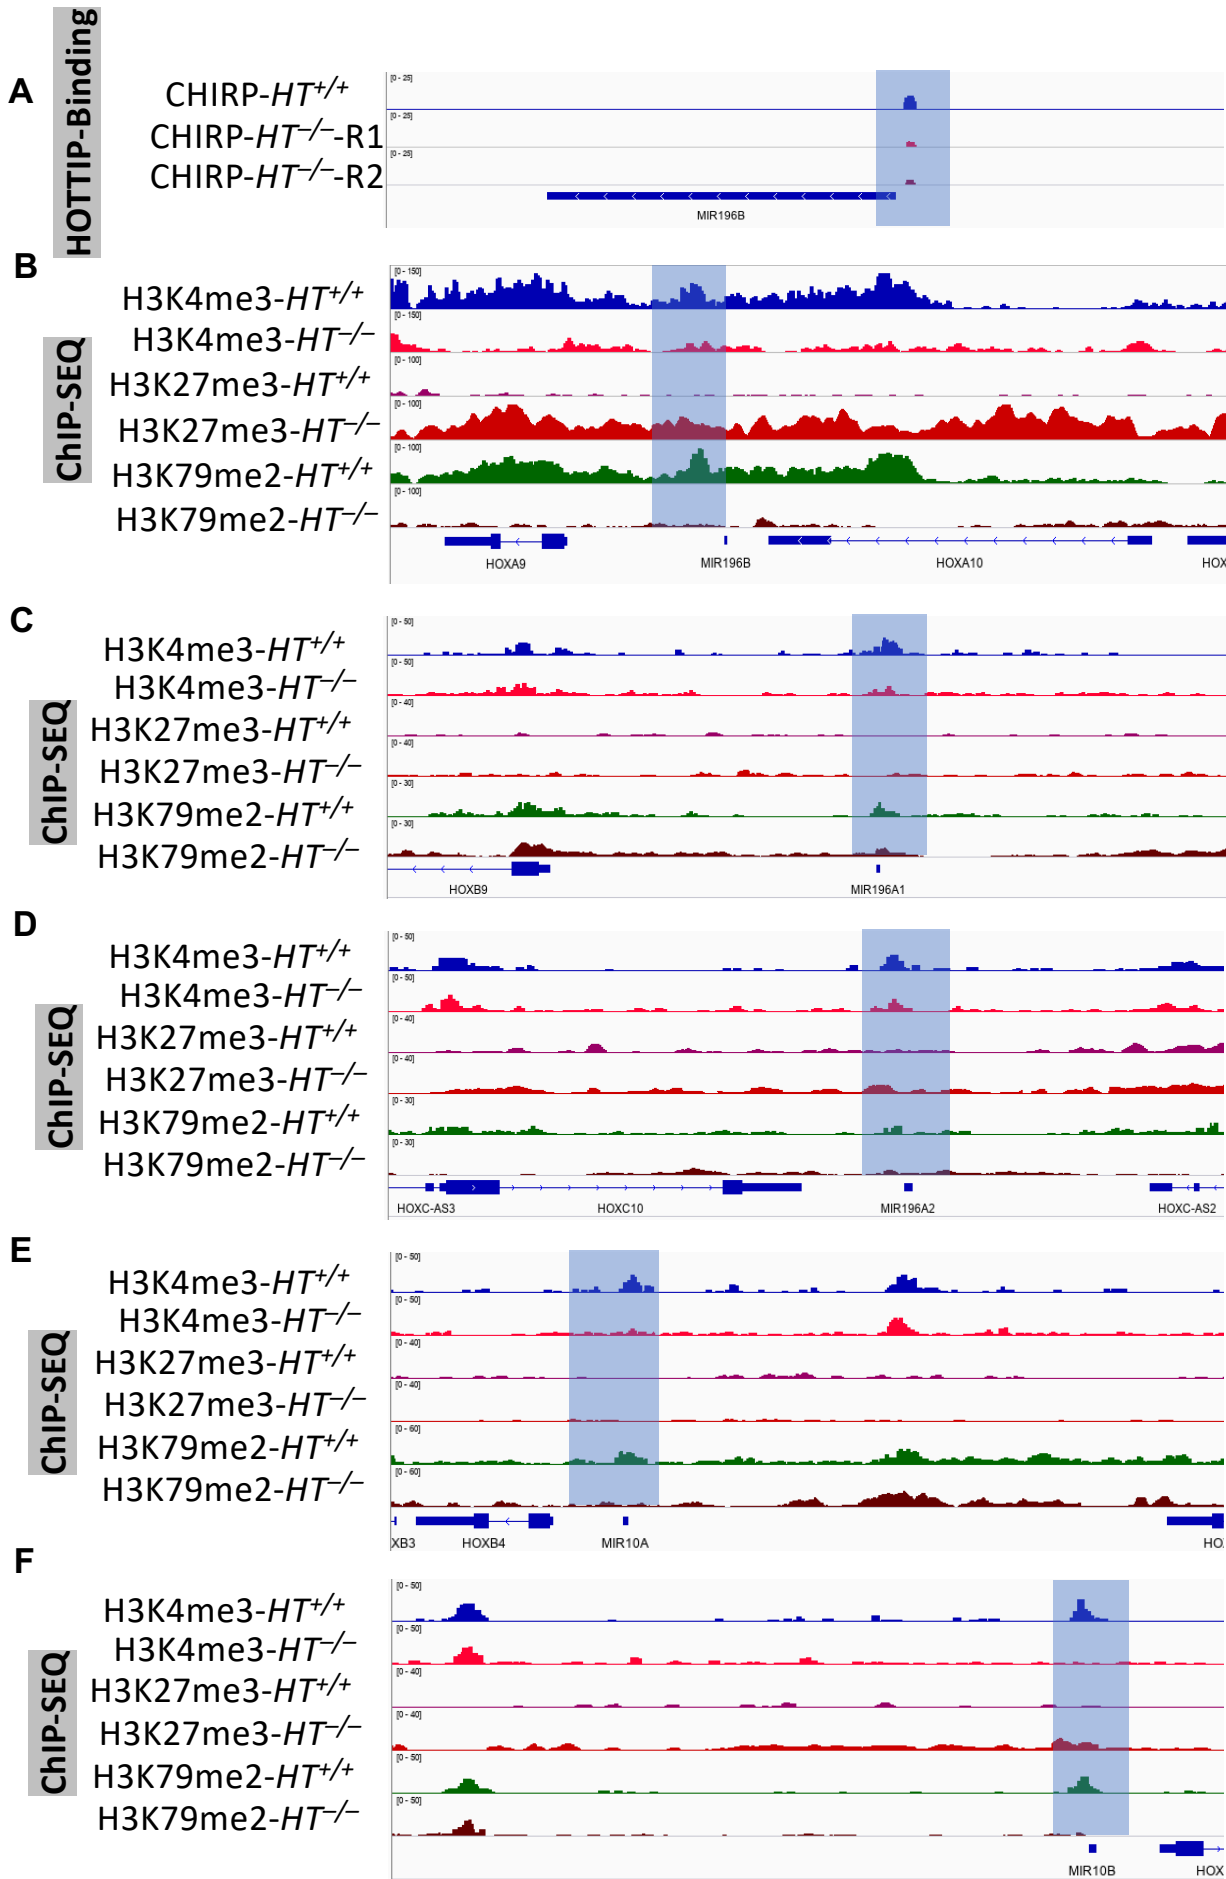

Figure 3

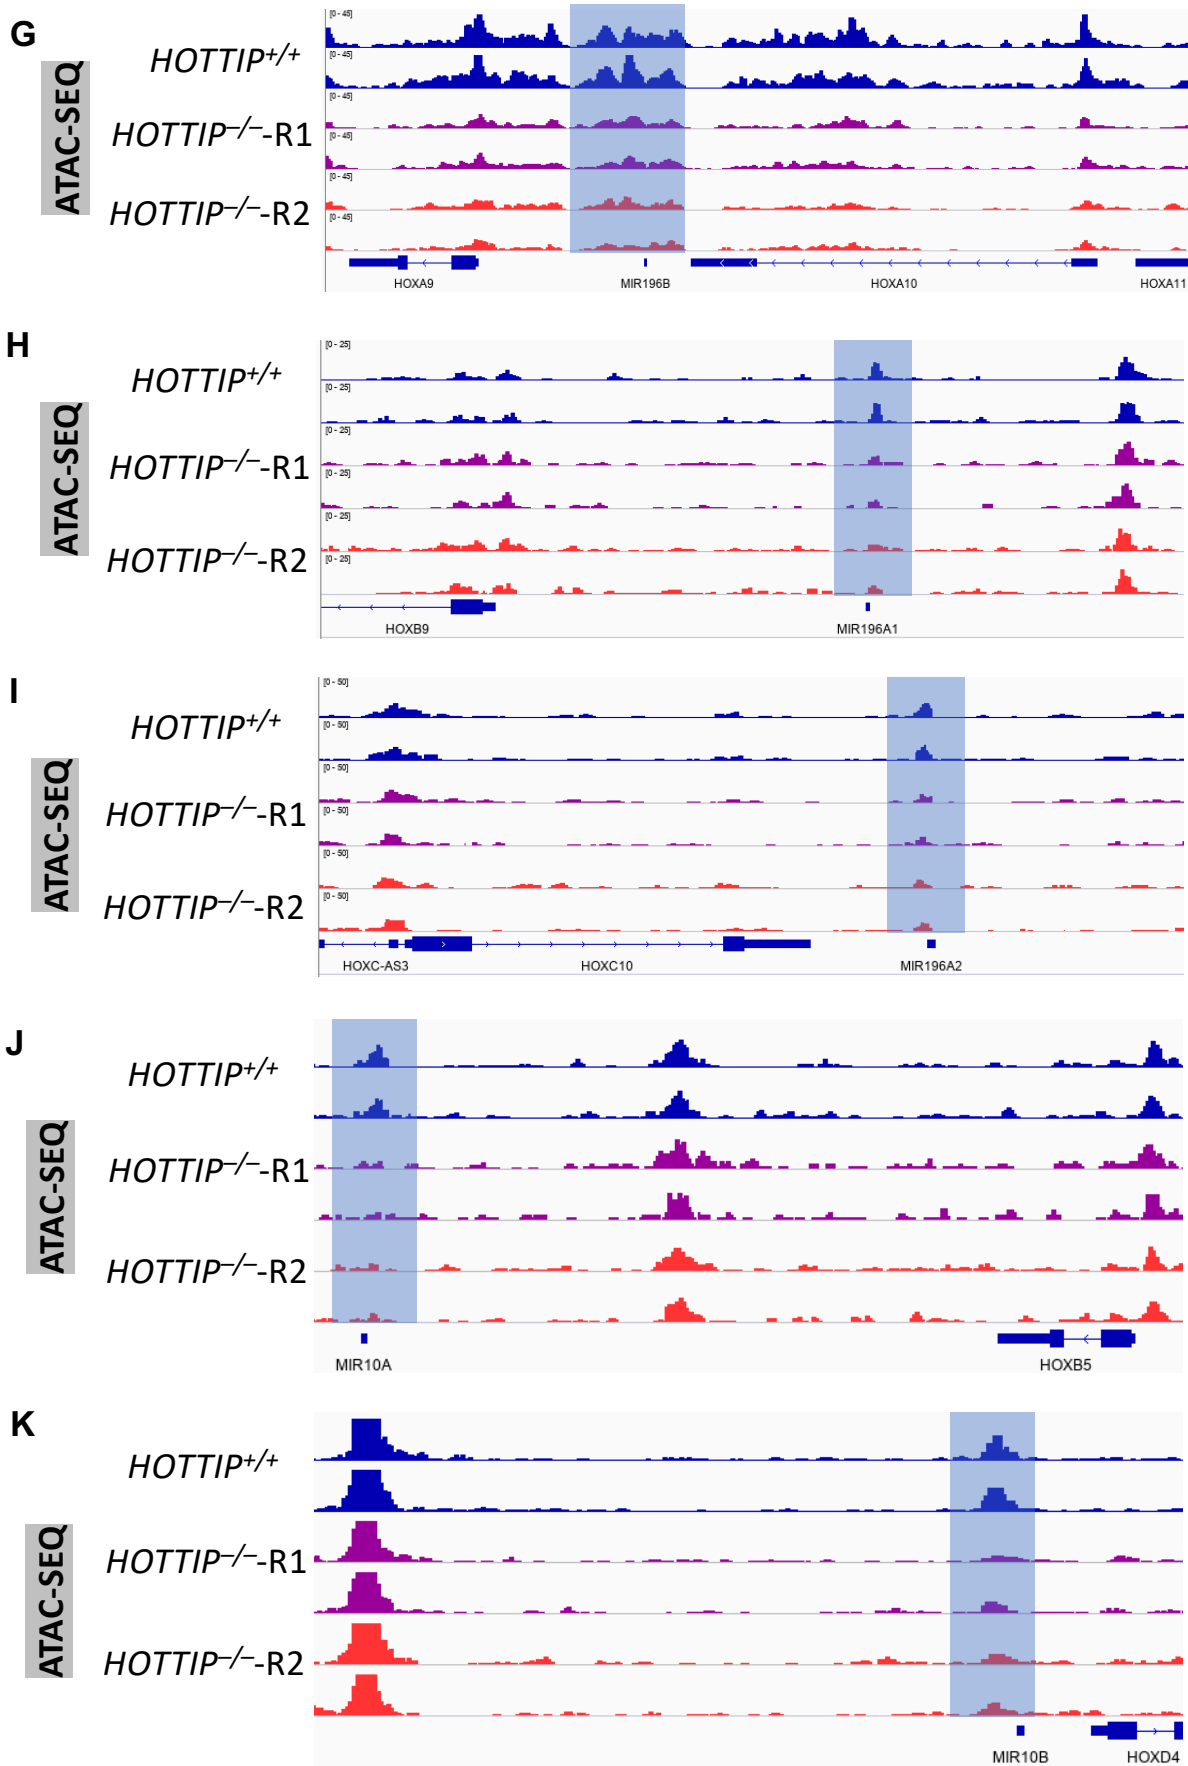

**A**

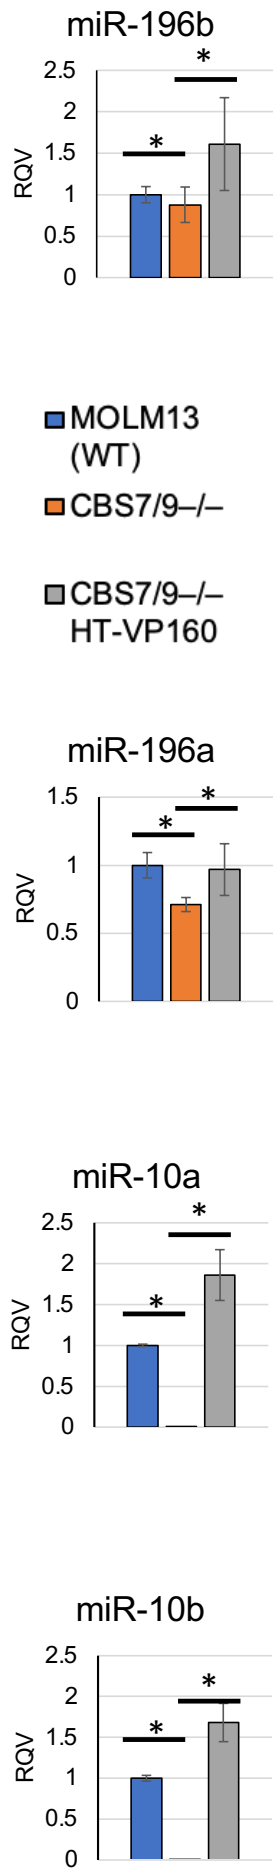

**B**

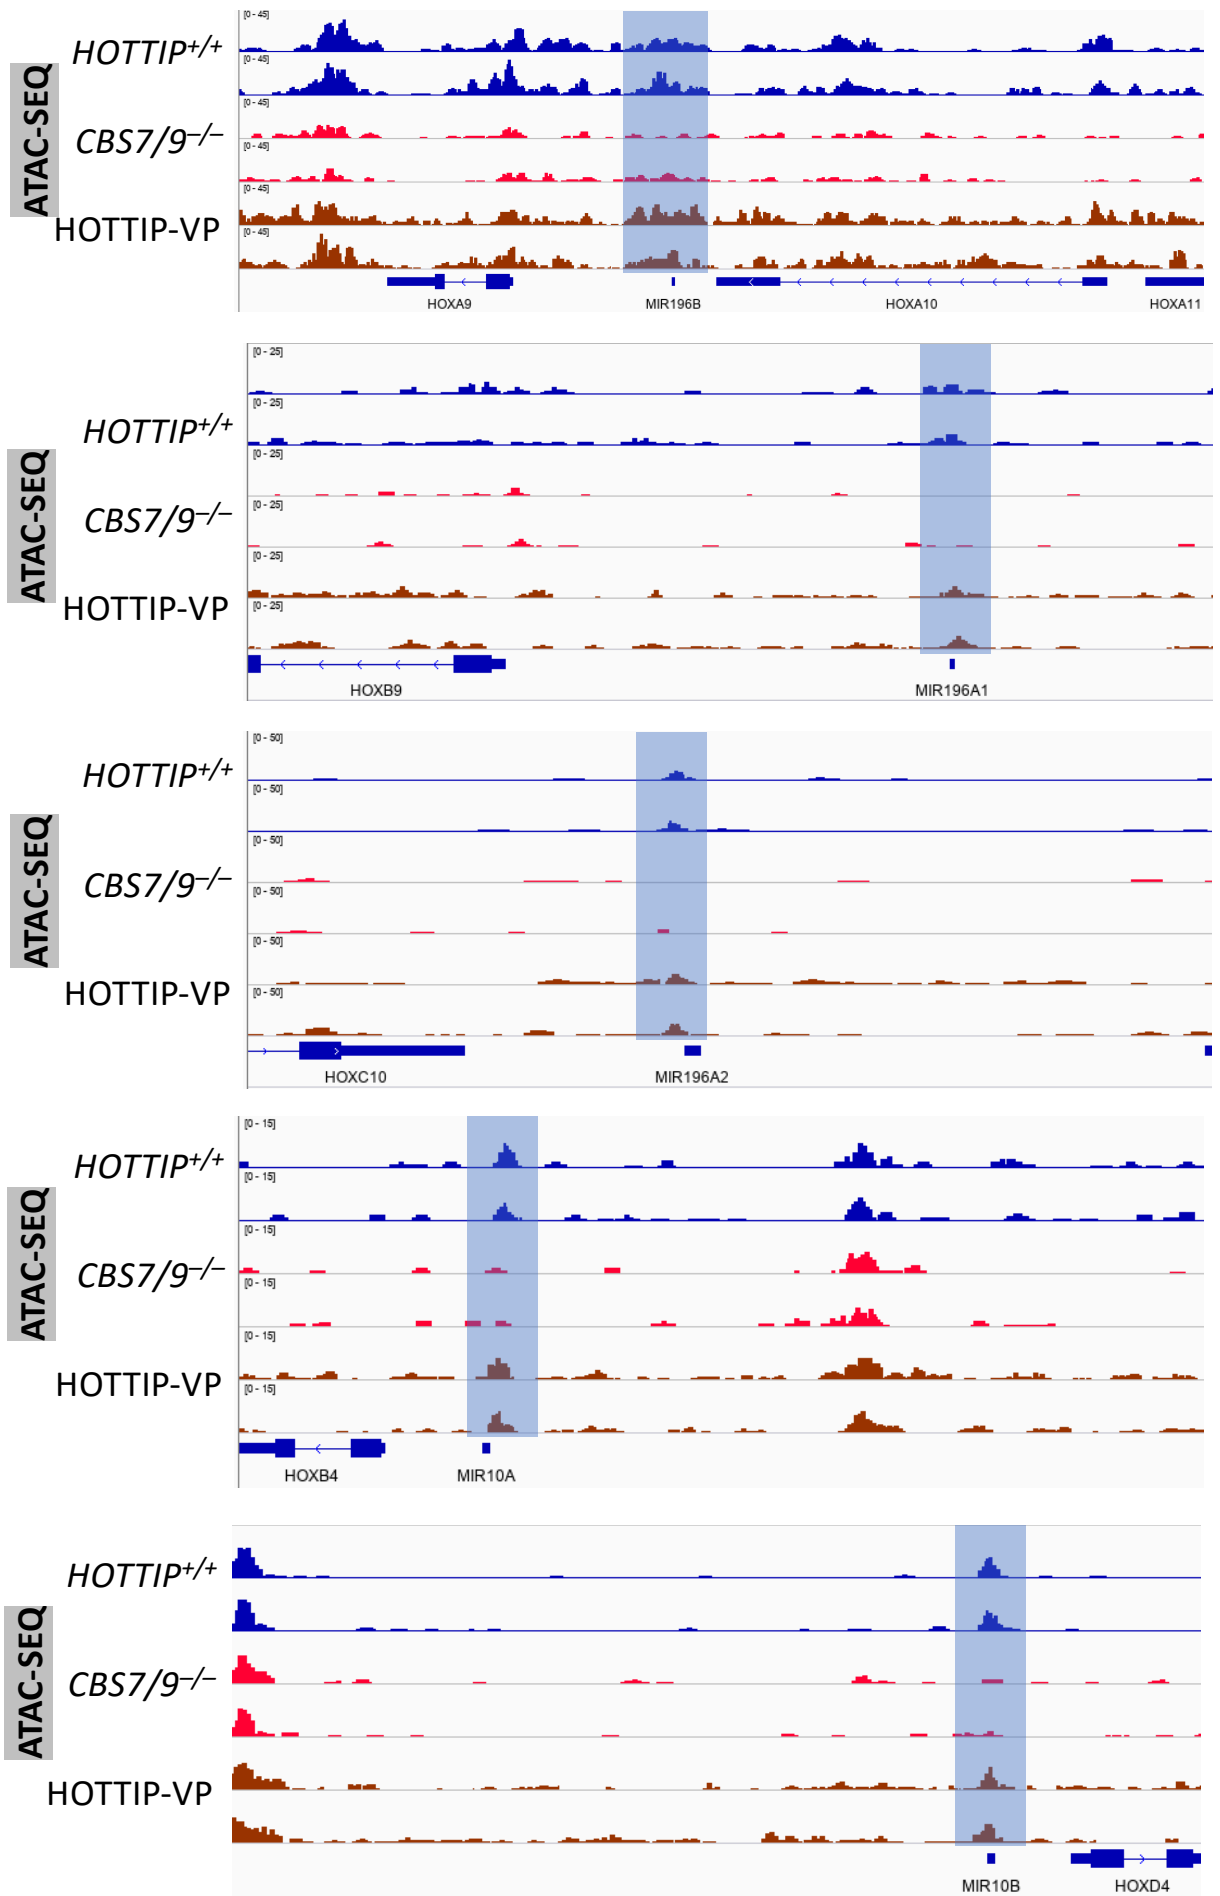

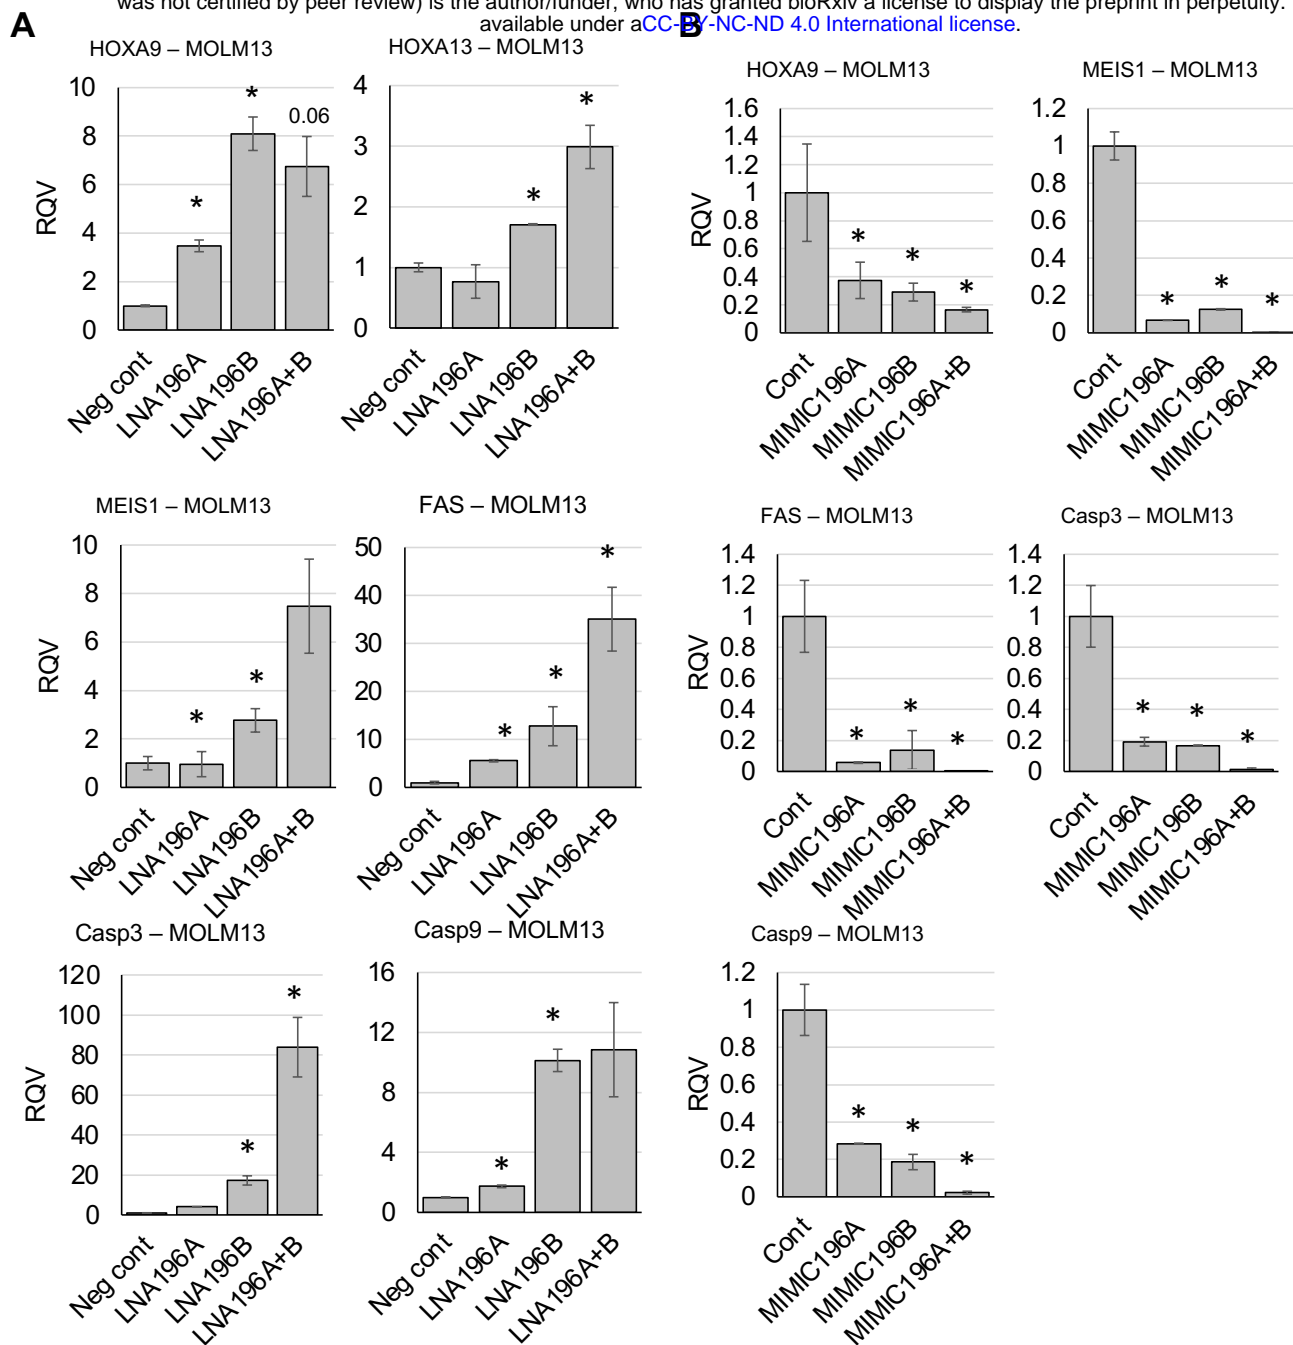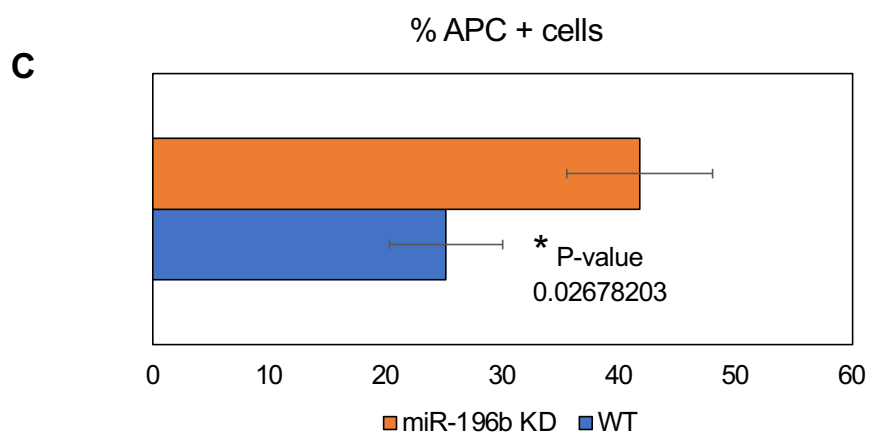

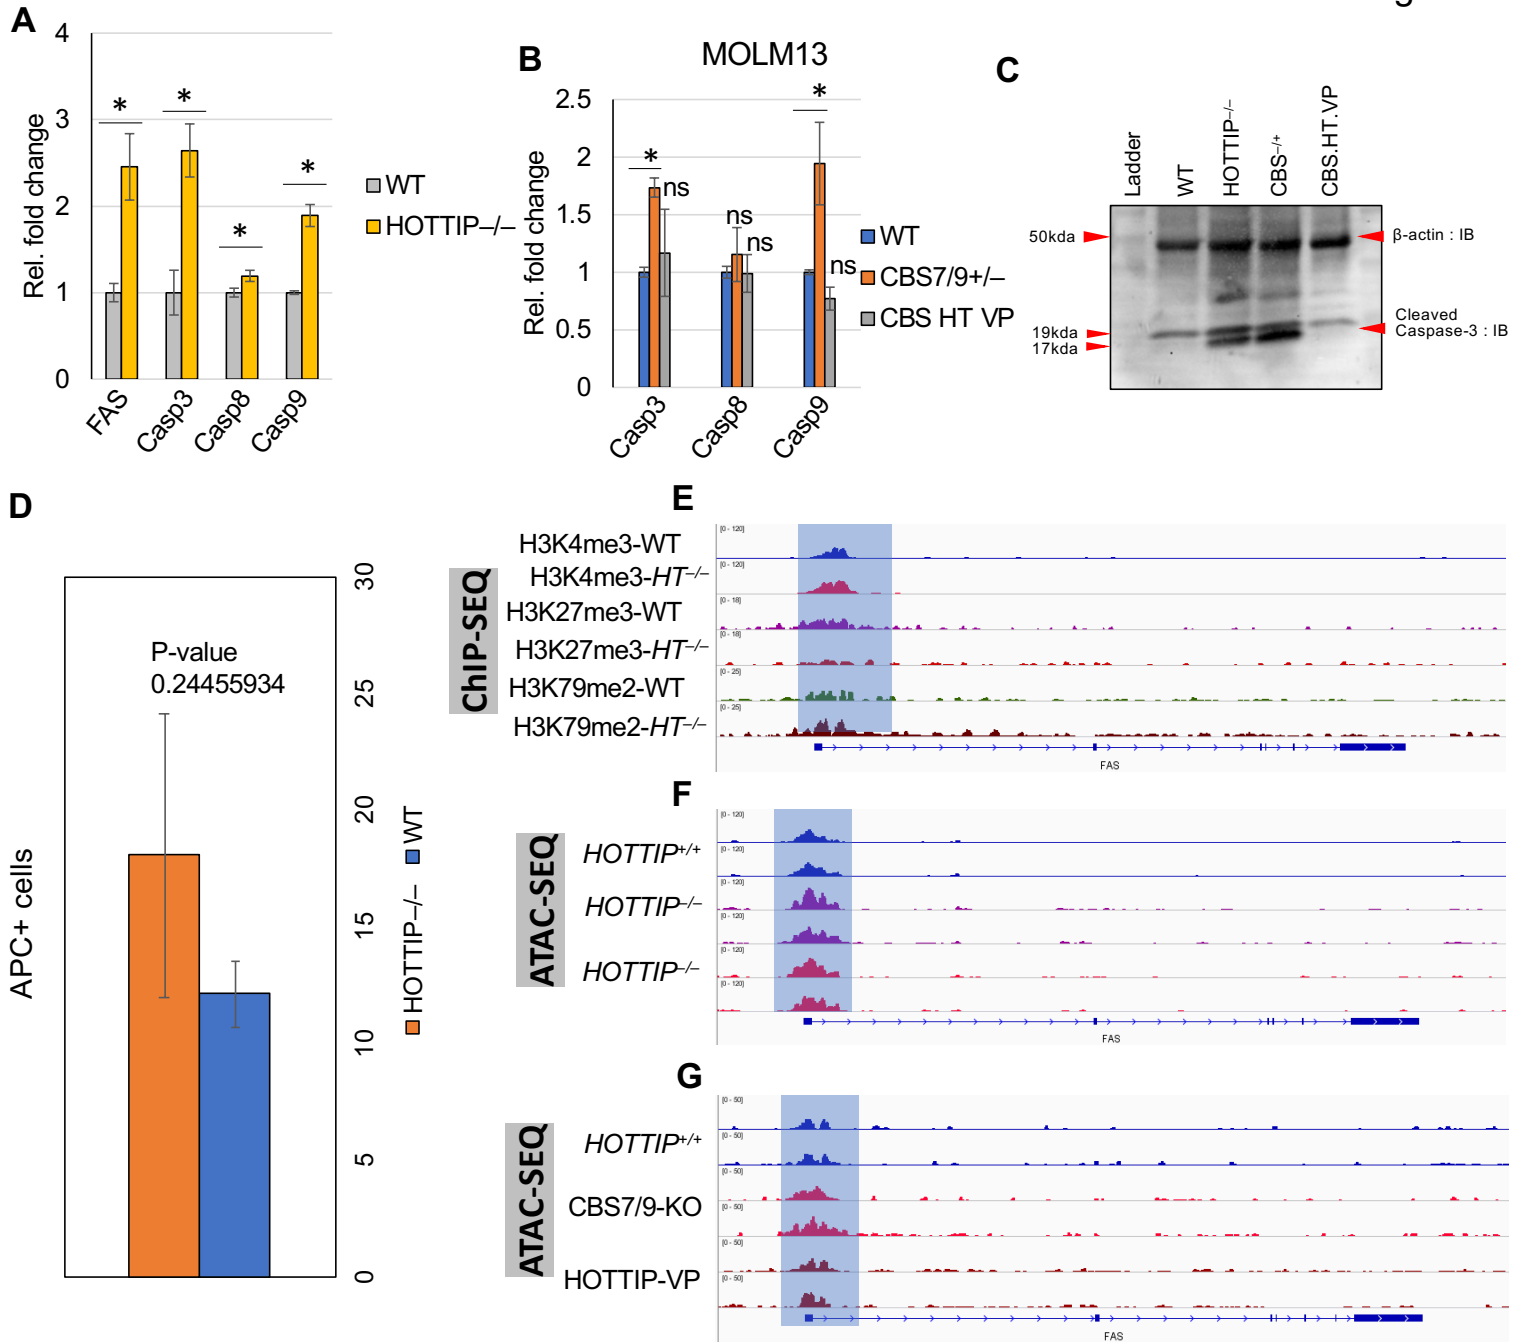

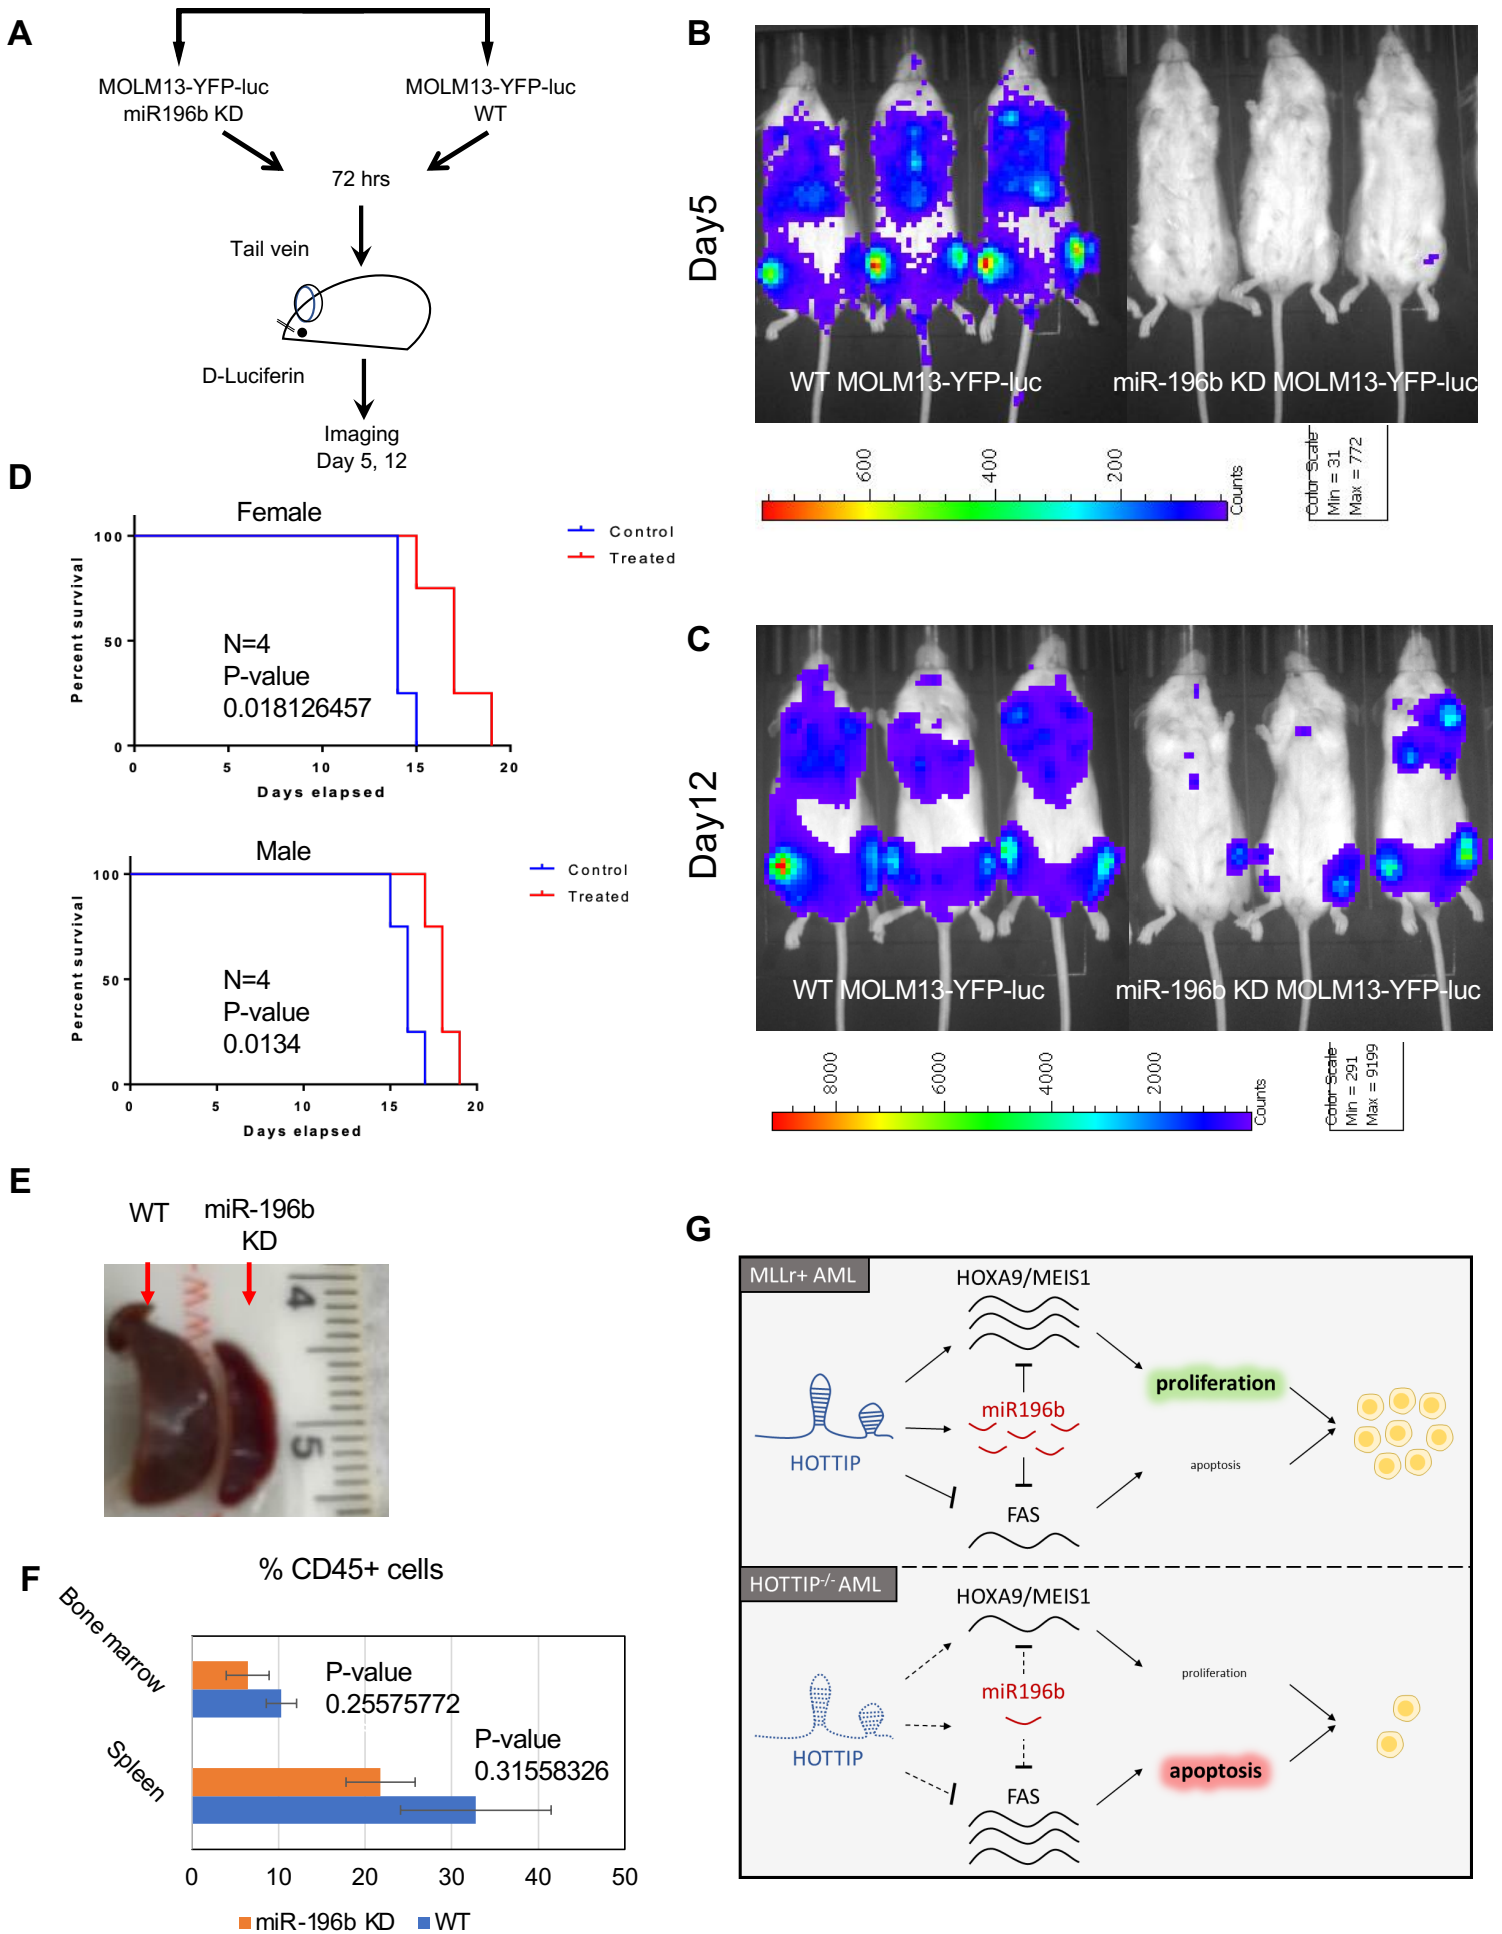

## Potential TF motifs in miR196b loci

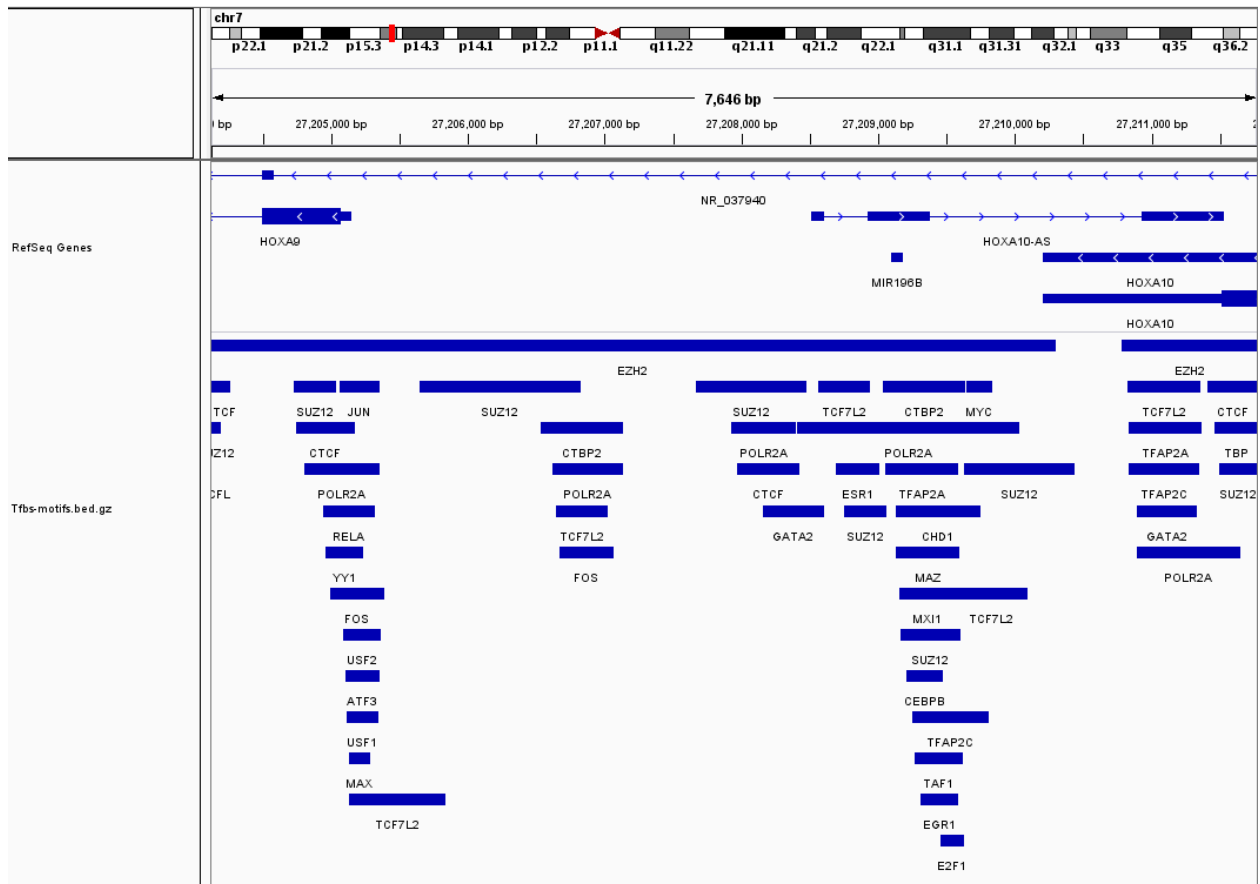



Control unstained

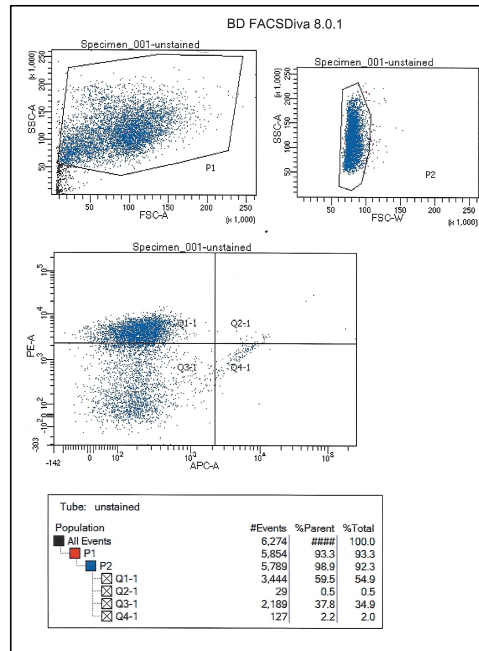

LNA Control

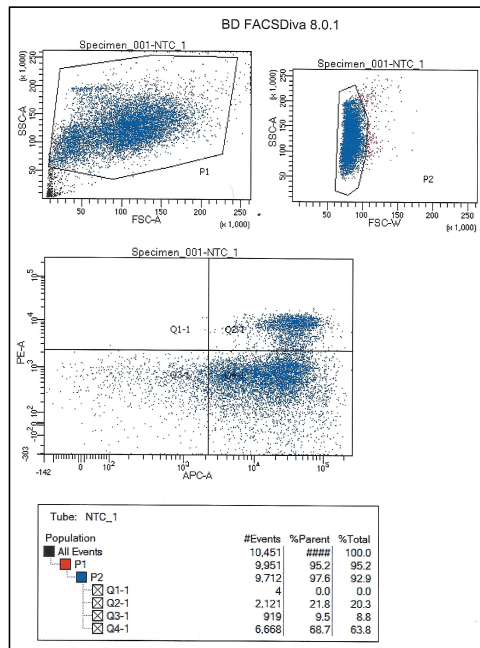

LNA 196B

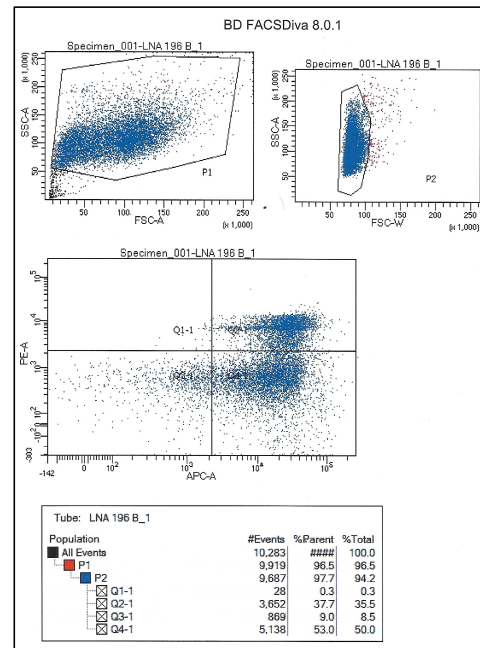

D

Control unstained

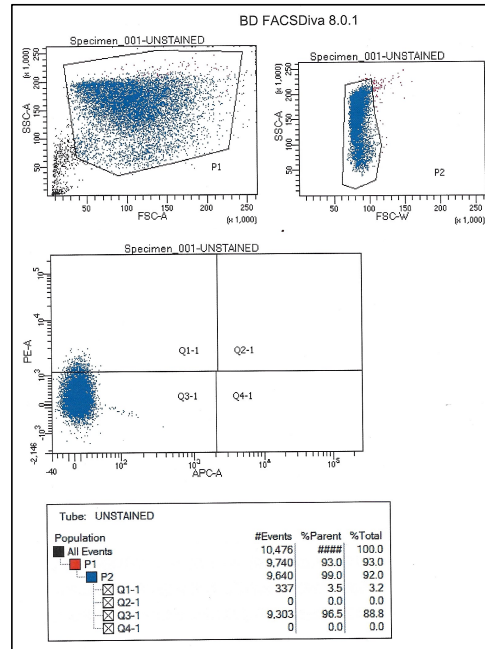

Wild Type

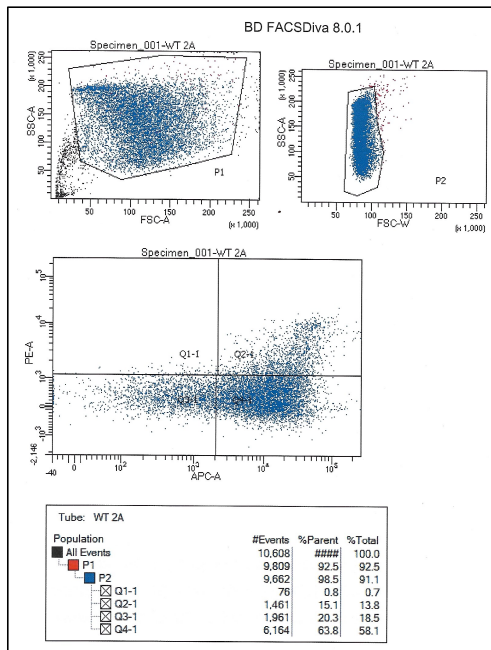

*Hottip*<sup>-/-</sup>

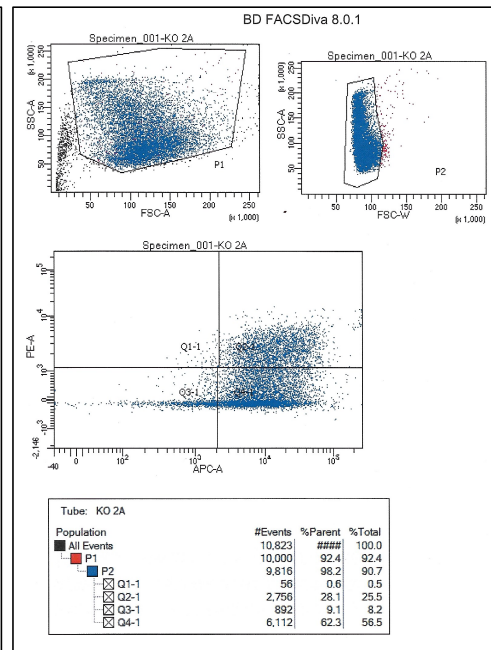

## Supplementary Figure 4

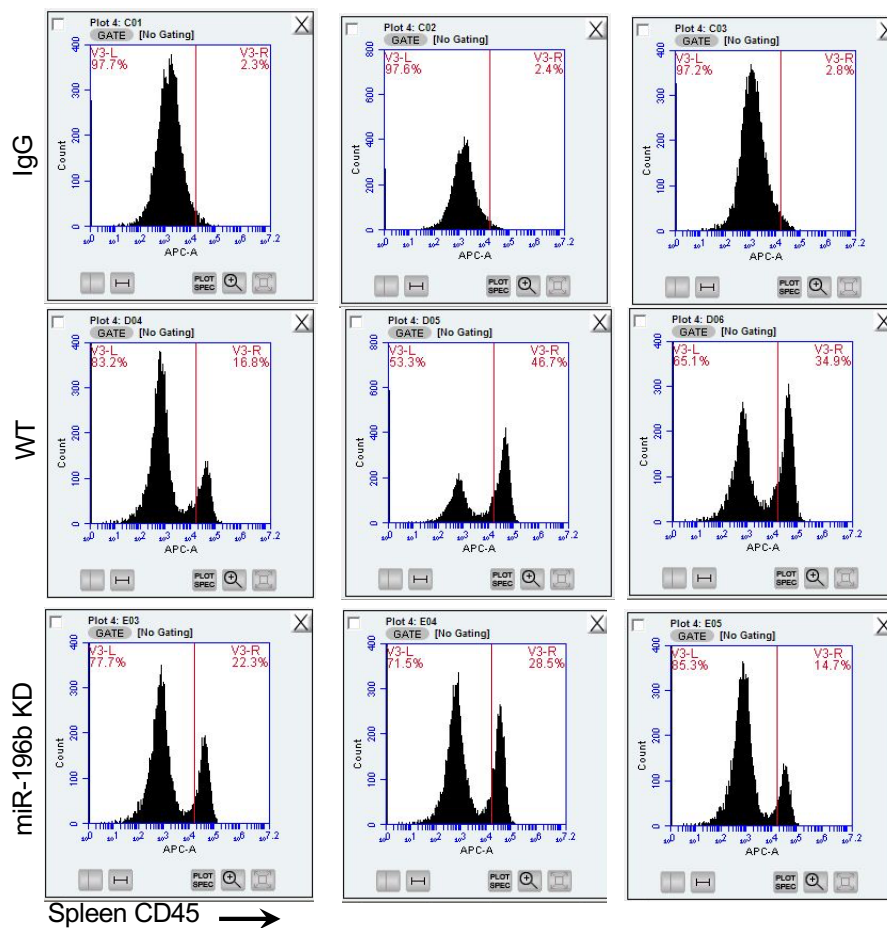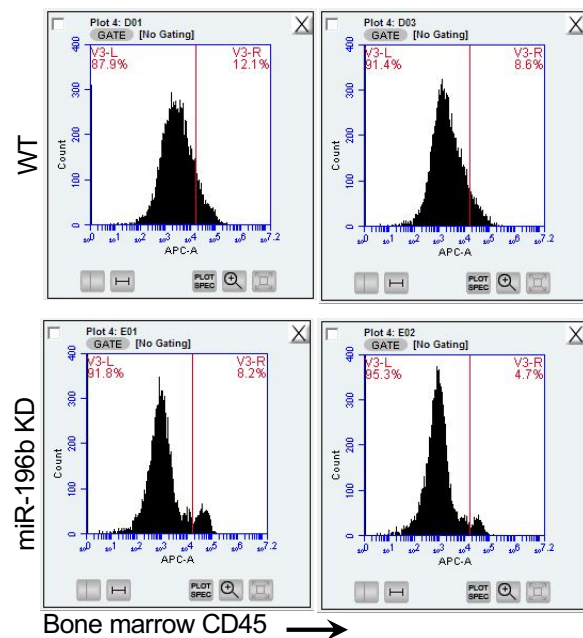

Source: https://biorxiv.org/content/10.1101/2021.07.15.452559v1.full.pdf
